# Supplementary material for: An Interpretable Classification Model Using Gluten-Specific TCR Sequences Shows Diagnostic Potential in Coeliac Disease
Source: MDPI journal article supplement (doi:10.3390/biom13121707), 2023-11-25
Supplement: s1 [file s1]

## 1 Supplementary Figures

### 1.1 **Supplementary Figure S1:** T cell receptors have 2 chains, according to which T cells can be categorized. Each TCR chain has a constant region and a variable region made up of V (D) and J segments

During T cell maturation/selection, T cells undergo somatic recombination, where the TCR gene segments are rearranged, leaving a few select gene segments, while the rest are deleted. During gene rearrangement the V-J segments are joined in TRA genes. In TRB genes, the D-J segments are joined first, followed by the joining of the selected V gene to the rearranged DJ segments. In the case of TRA and TRB genes, additional junctional diversity is generated at each joining step through the addition of random, non-templated nucleotides.

The complementarity-determining region 3 (CDR3) is crucial in antigen recognition. CDR3 of T cells is highly variable, and is located at the V(D)J junction for each TCR chain.

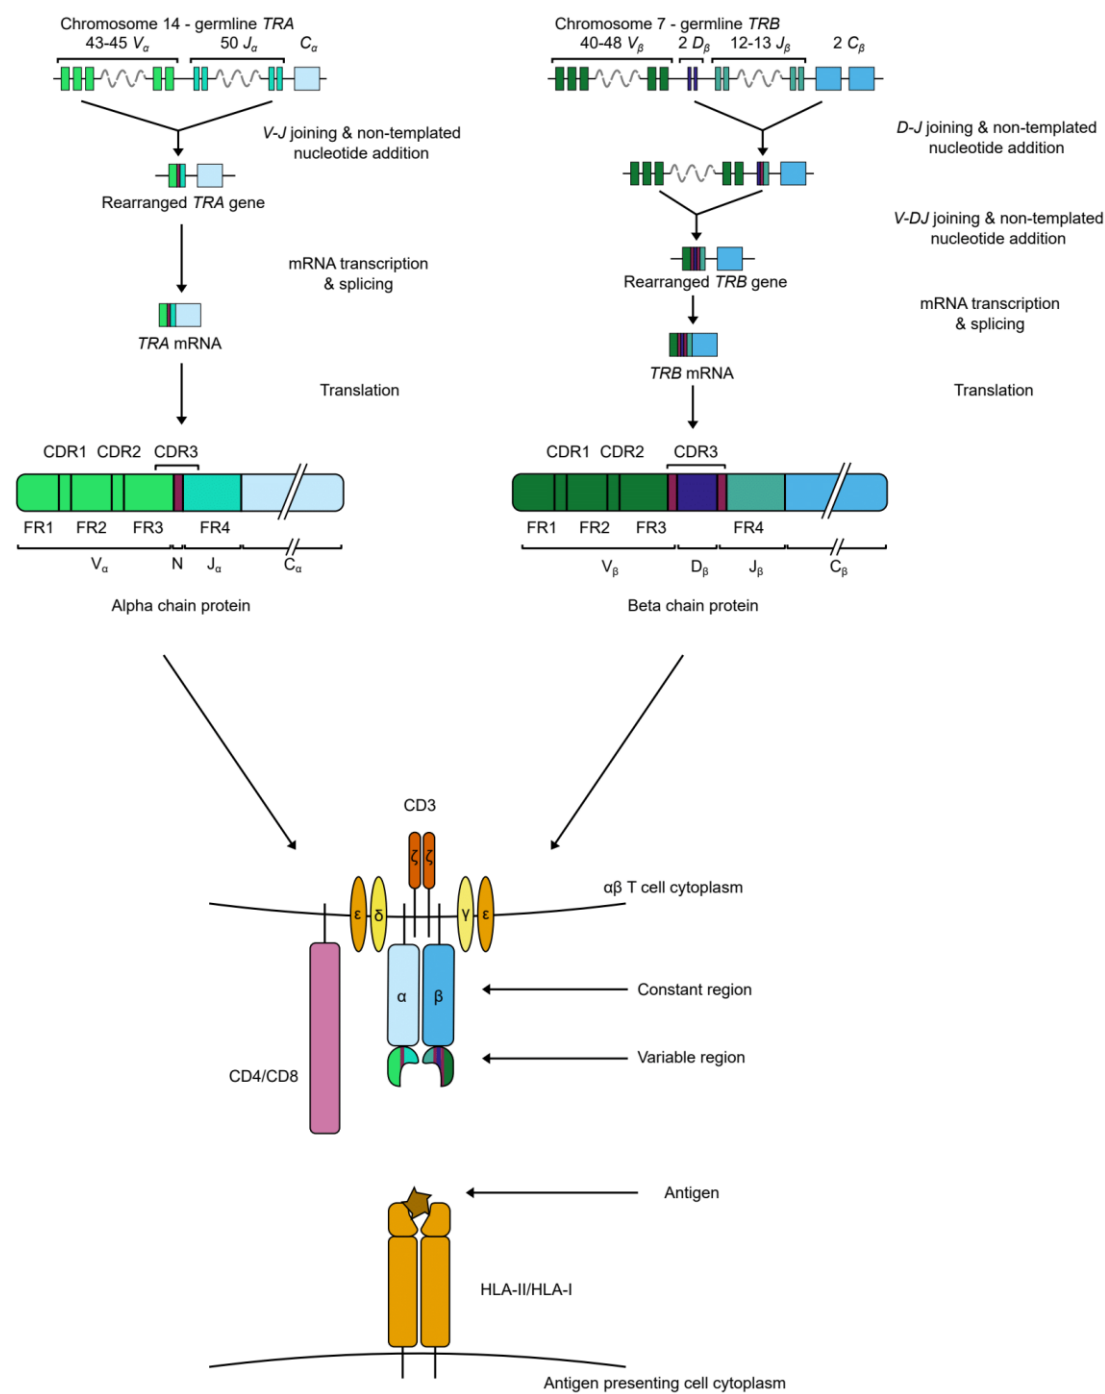

## 1.2 Supplementary Figure S2: Training TCR- $\alpha$ dataset summary

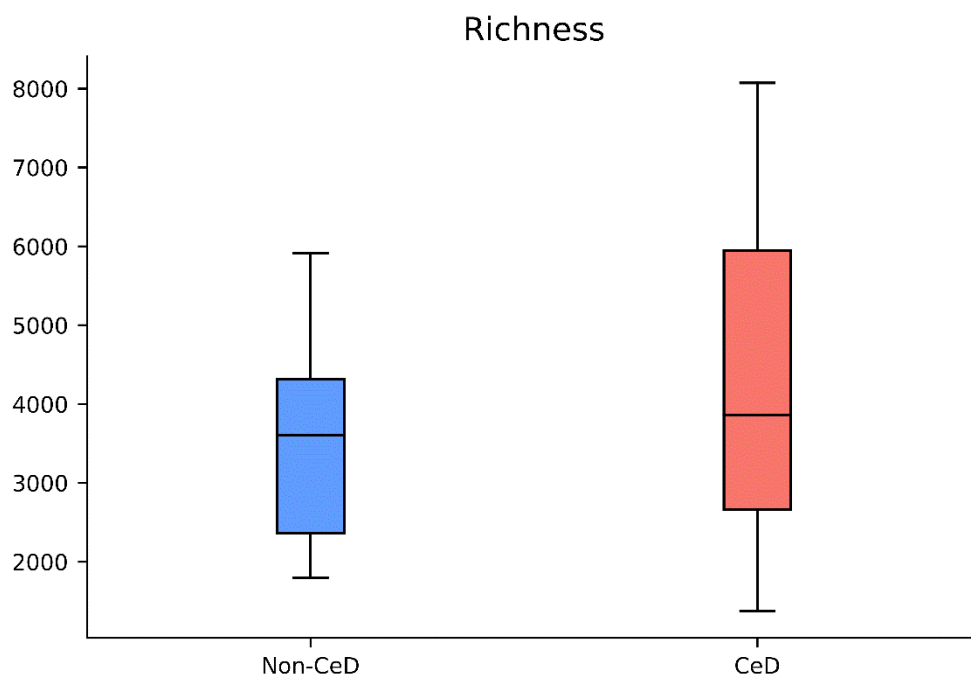

- a. Boxplot indicating richness (number of unique sequences) in TCR- $\alpha$  repertoire samples from CeD patients and non-CeD individuals. No significant difference in mean between the two groups was found (adjusted  $p = 1.00$ , unadjusted  $p = 0.402$ ).

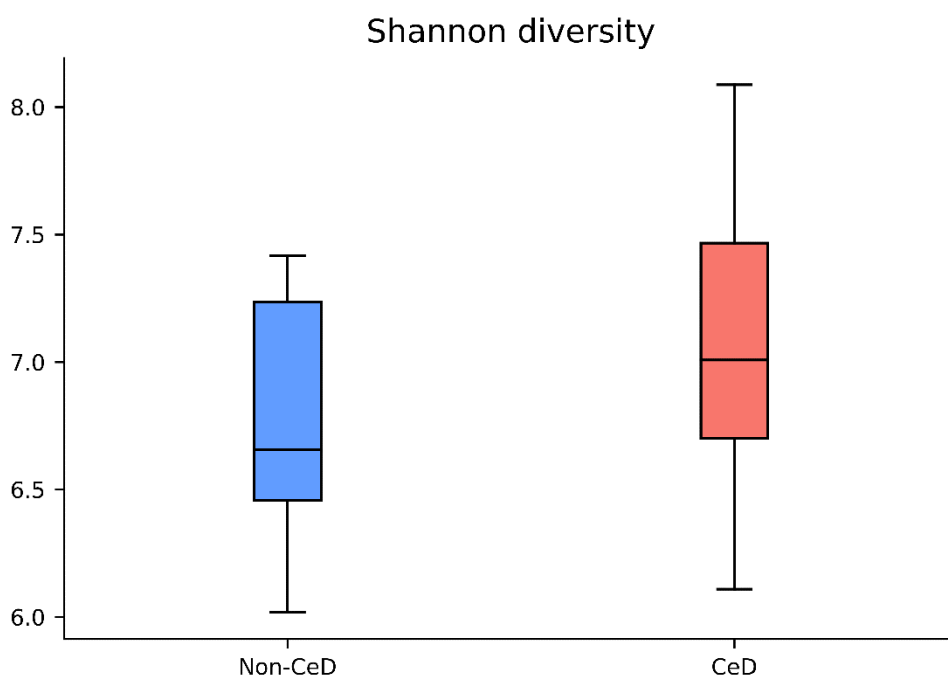

- b. Boxplot indicating Shannon diversity in TCR- $\alpha$  repertoire samples from CeD patients and non-CeD individuals. No significant difference in mean between the two groups was found (adjusted  $p = 0.663$ , unadjusted  $p = 0.221$ ).

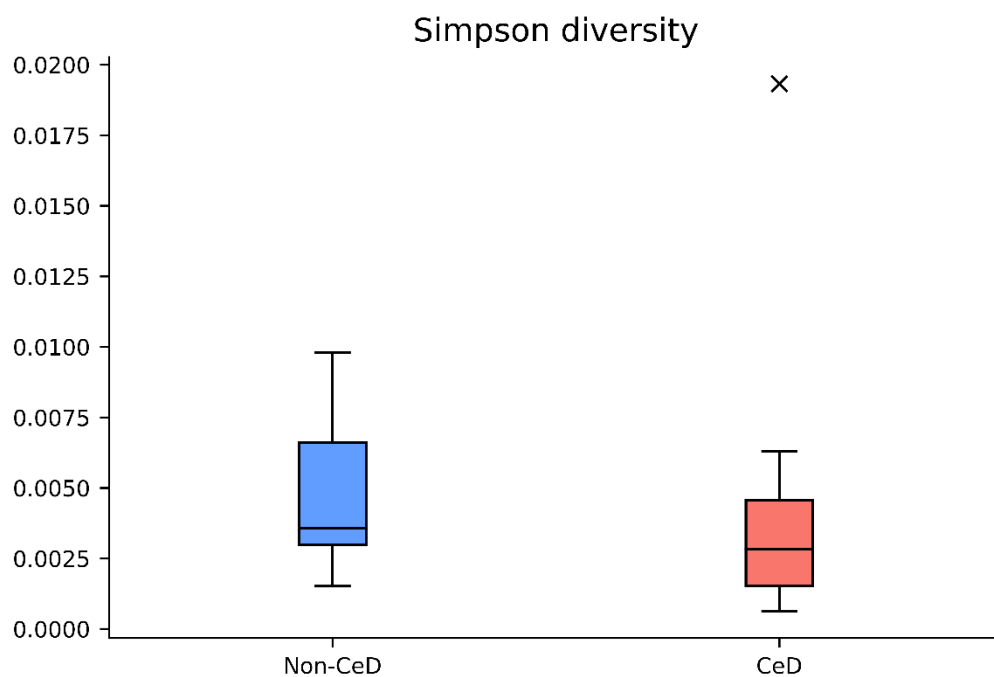

- c. Boxplot indicating Simpson diversity in TCR- $\alpha$  repertoire samples from CeD patients and non-CeD individuals. No significant difference in mean between the two groups was found (adjusted  $p = 1.00$ , unadjusted  $p = 0.776$ ).

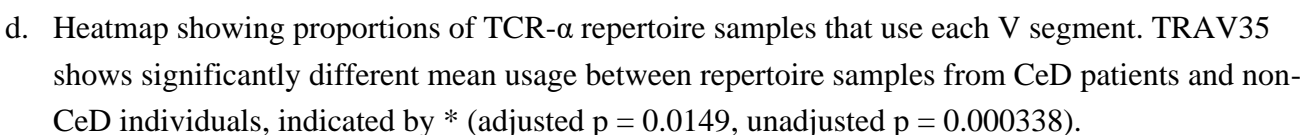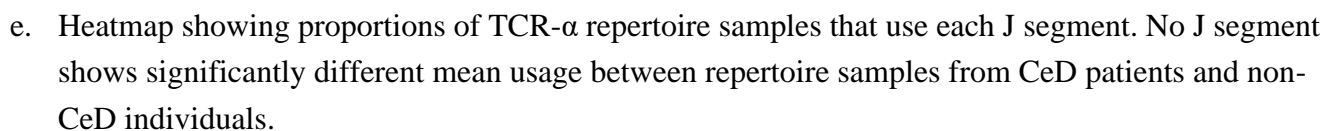

### 1.3 Supplementary Figure S3: Training TCR- $\beta$ dataset summary.

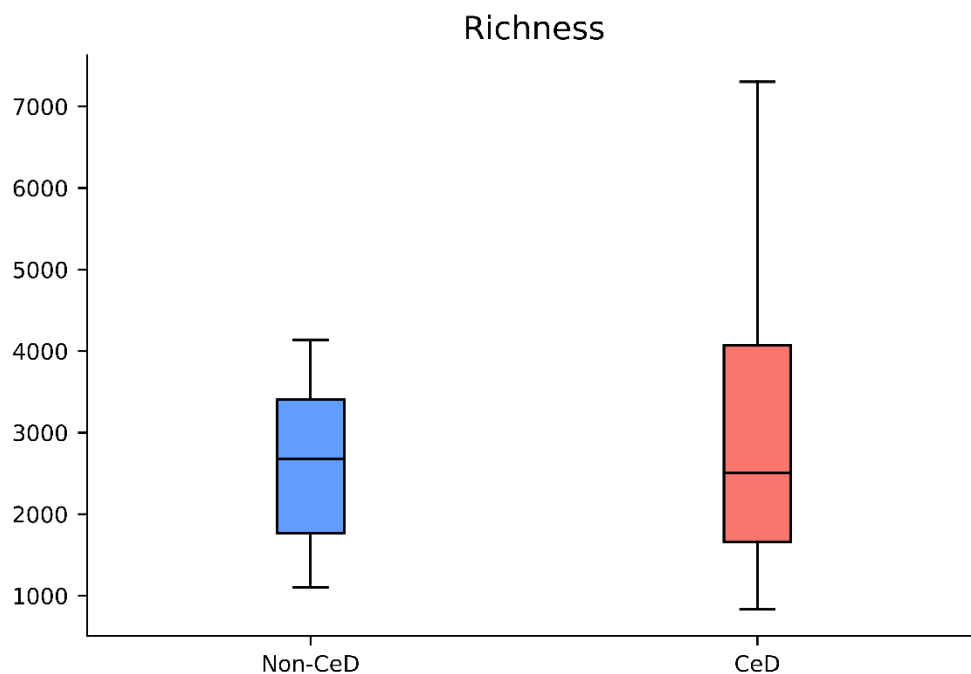

- a. Boxplot indicating richness (number of unique sequences) in TCR- $\beta$  repertoire samples from CeD patients and non-CeD individuals. No significant difference in mean between the two groups was found (adjusted  $p = 1.00$ , unadjusted  $p = 0.483$ ).

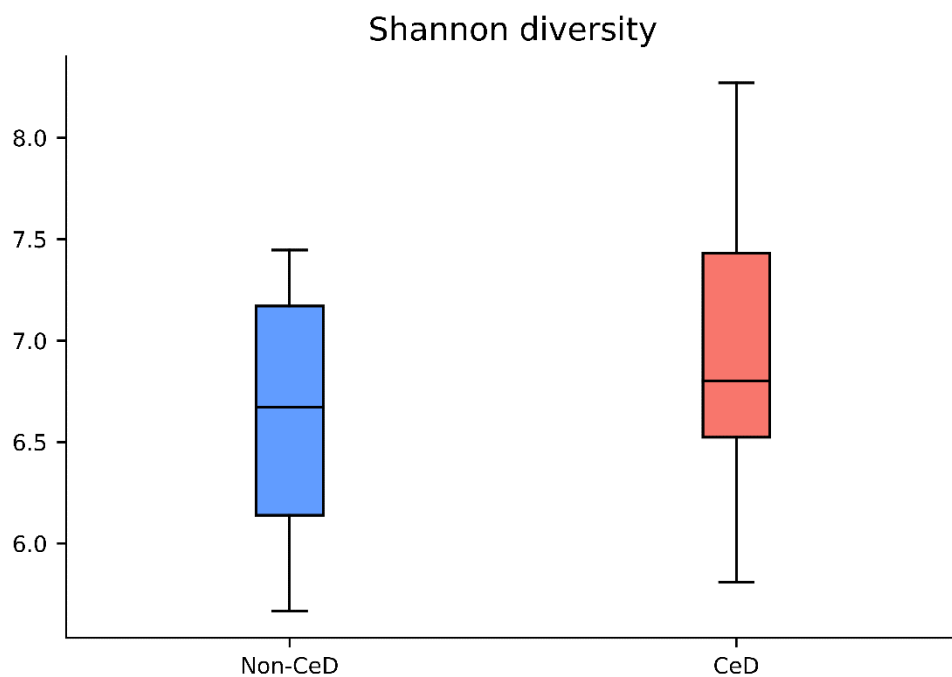

- b. Boxplot indicating Shannon diversity in TCR- $\beta$  repertoire samples from CeD patients and non-CeD individuals. No significant difference in mean between the two groups was found (adjusted  $p = 1.00$ , unadjusted  $p = 0.382$ ).

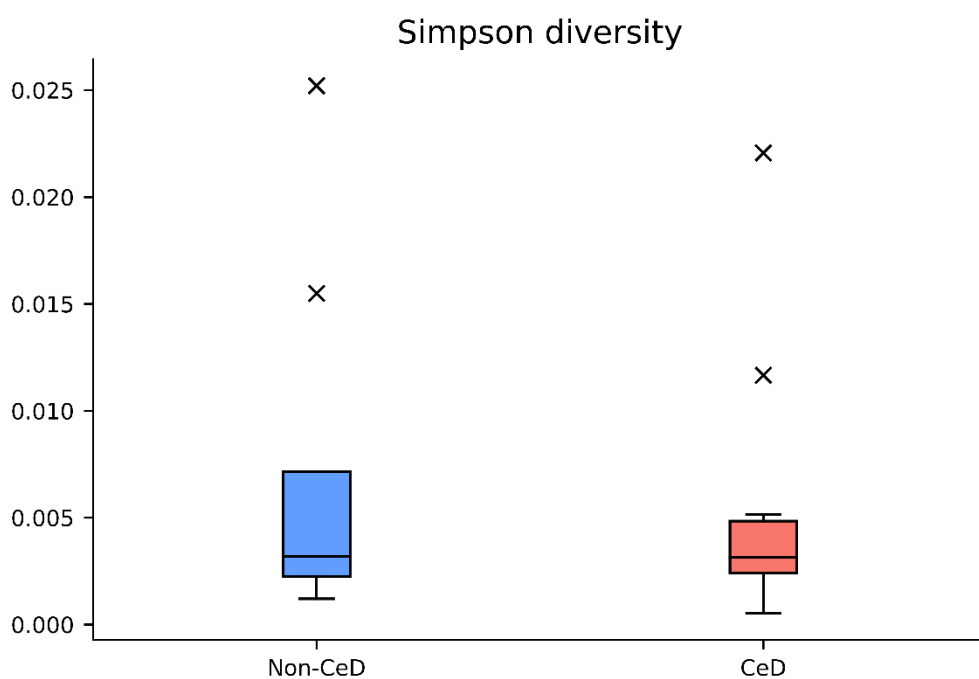

- c. Boxplot indicating Simpson diversity in TCR- $\beta$  repertoire samples from CeD patients and non-CeD individuals. No significant difference in mean between the two groups was found (adjusted  $p = 1.00$ , unadjusted  $p = 0.568$ ).

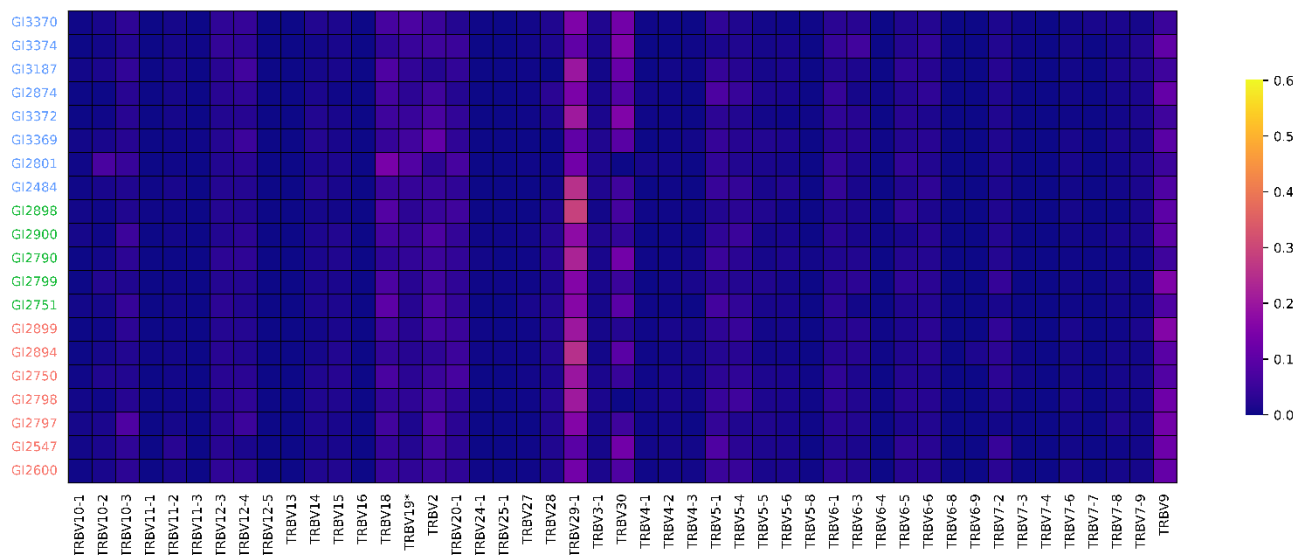

- d. Heatmap showing proportions of TCR- $\beta$  repertoire samples that use each V segment. We observed significantly lower usage of segment TRBV19 (adjusted  $p = 0.0340$ , unadjusted  $p = 0.000724$ ), indicated by \*, in CeD patient samples compared to non-CeD samples.

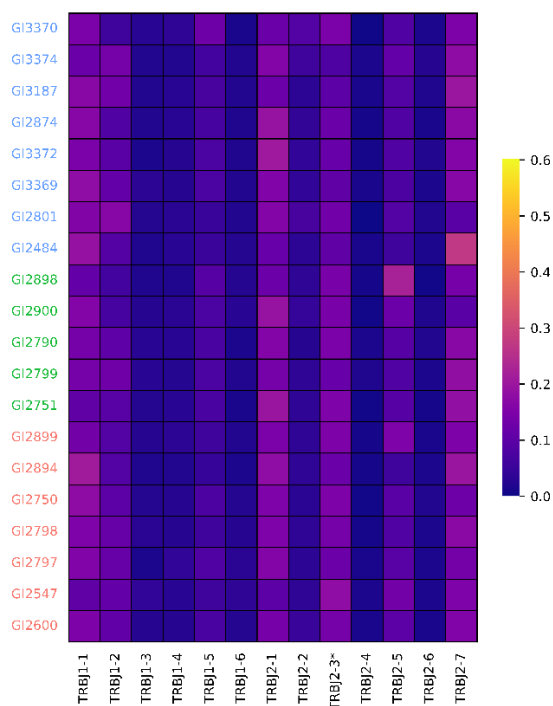



- e. Heatmap showing proportions of TCR- $\beta$  repertoire samples that use each J segment. We observed significantly higher usage of segment TRBJ2-3 (adjusted  $p = 0.0422$ , unadjusted  $p = 0.00325$ ), indicated by \*, in CeD patient samples compared to non-CeD samples, see S2h.

#### 1.4 Supplementary Figure S4: Testing TCR- $\alpha$ dataset summary.

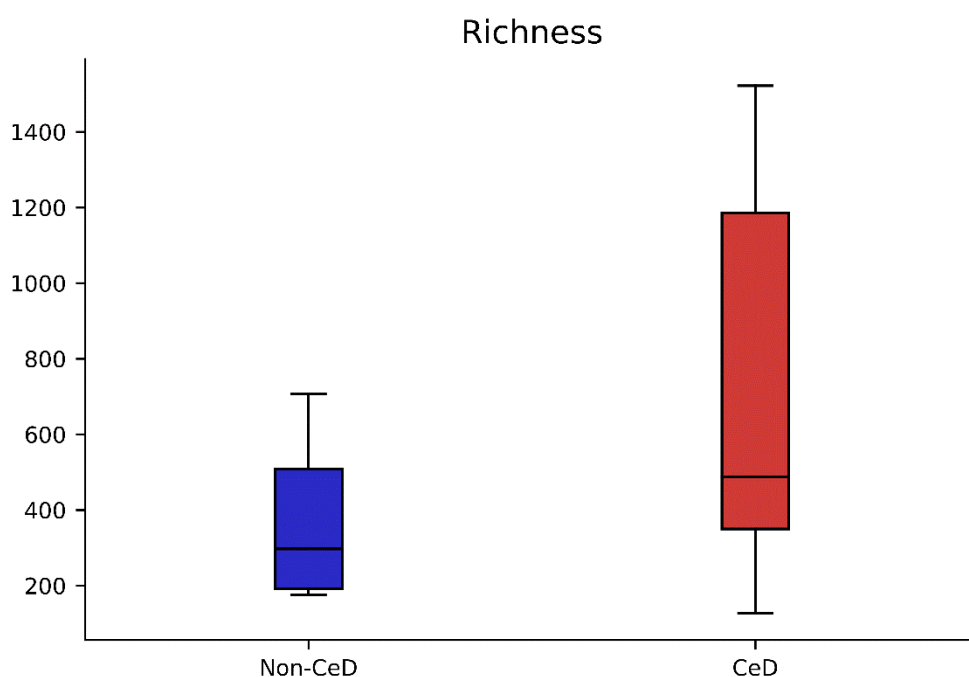

- a. Boxplot indicating richness (number of unique sequences) in TCR- $\alpha$  repertoire samples from CeD patients and non-CeD individuals. No significant difference in mean between the two groups was found (adjusted  $p = 0.464$ , unadjusted  $p = 0.155$ ).

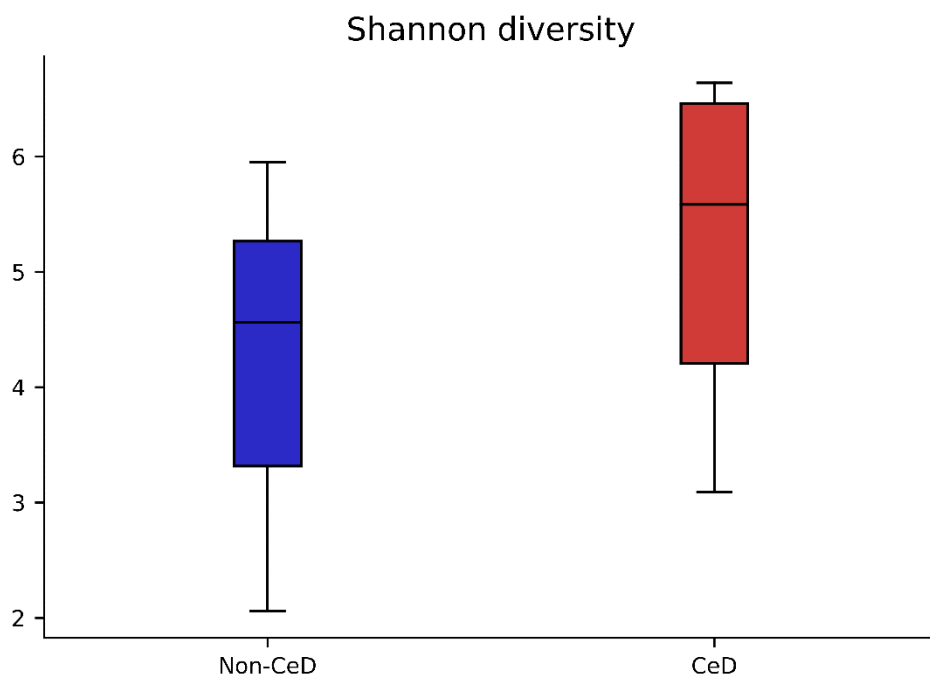

- b. Boxplot indicating Shannon diversity in TCR- $\alpha$  repertoire samples from CeD patients and non-CeD individuals. No significant difference in mean between the two groups was found (adjusted  $p = 0.475$ , unadjusted  $p = 0.158$ ).

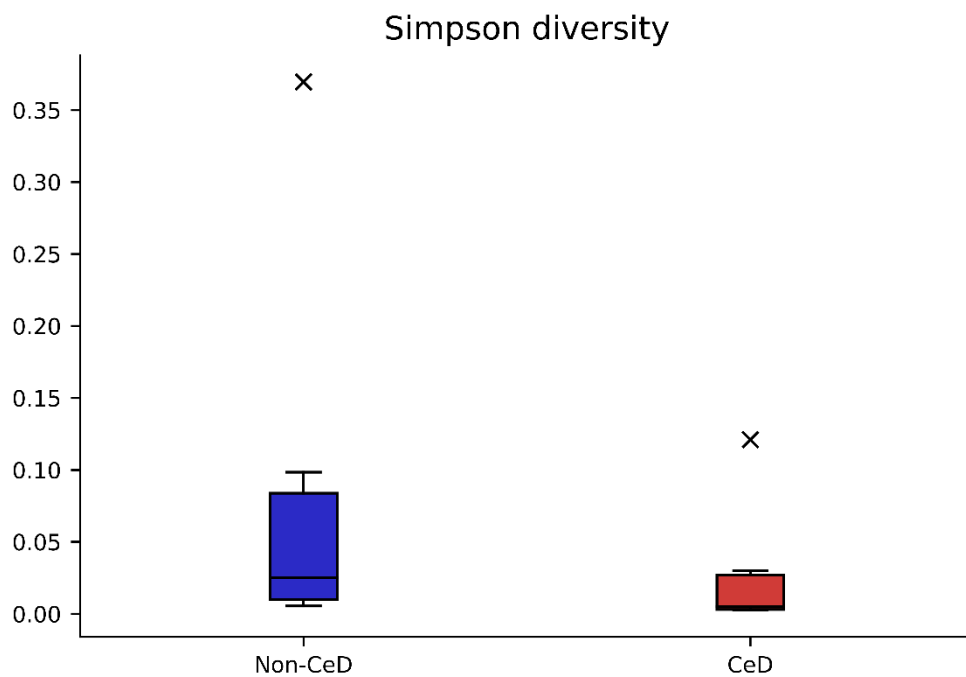

- c. Boxplot indicating Simpson diversity in TCR- $\alpha$  repertoire samples from CeD patients and non-CeD individuals. No significant difference in mean between the two groups was found (adjusted  $p=0.598$ , unadjusted  $p=0.199$ ).

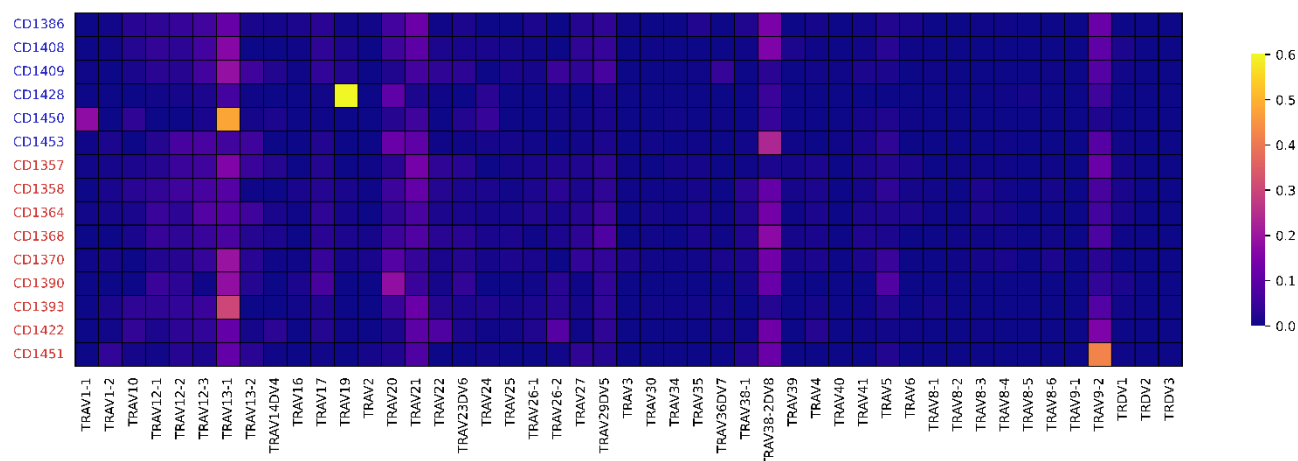

- d. Heatmap showing proportions of TCR- $\alpha$  repertoire samples that use each V segment. No V segment shows significantly different mean usage between repertoire samples from CeD patients and non-CeD individuals.

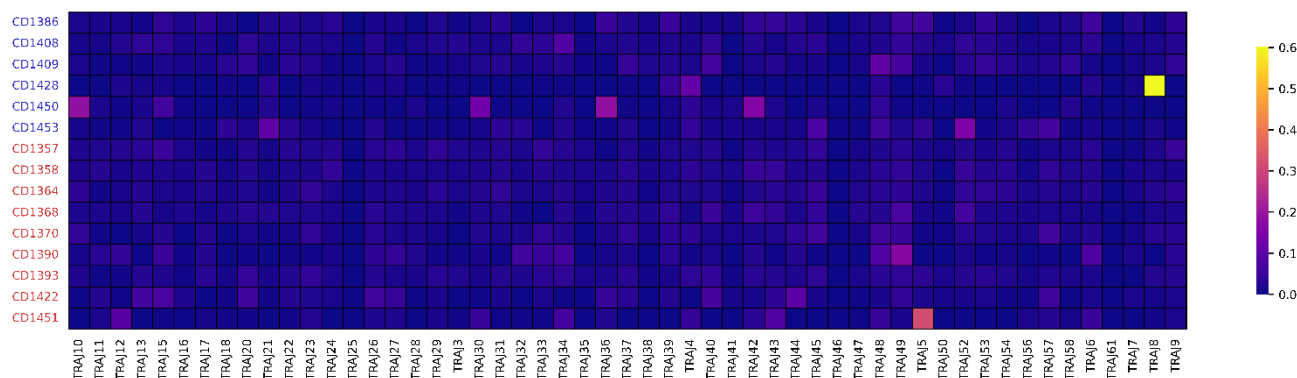

- e. Heatmap showing proportions of TCR- $\alpha$  repertoire samples that use each J segment. No V segment shows significantly different mean usage between repertoire samples from CeD patients and non-CeD individuals.

### 1.5 Supplementary Figure S5: Testing TCR- $\beta$ dataset summary.

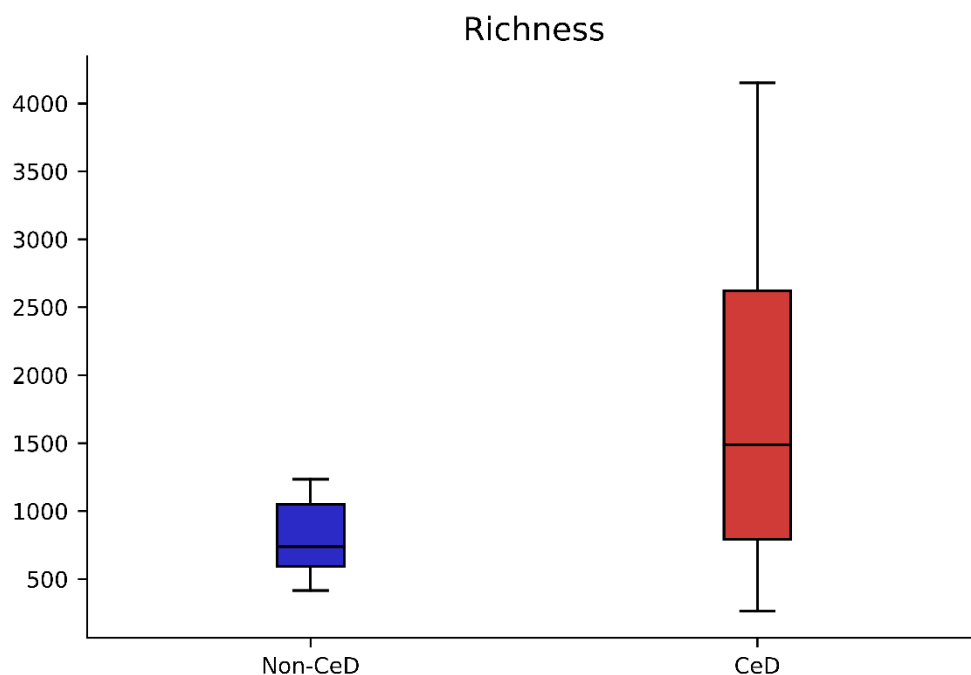

- a. Boxplot indicating richness (number of unique sequences) in TCR- $\beta$  repertoire samples from CeD patients and non-CeD individuals. No significant difference in mean between the two groups was found (adjusted  $p = 0.313$ , unadjusted  $p = 0.104$ ).

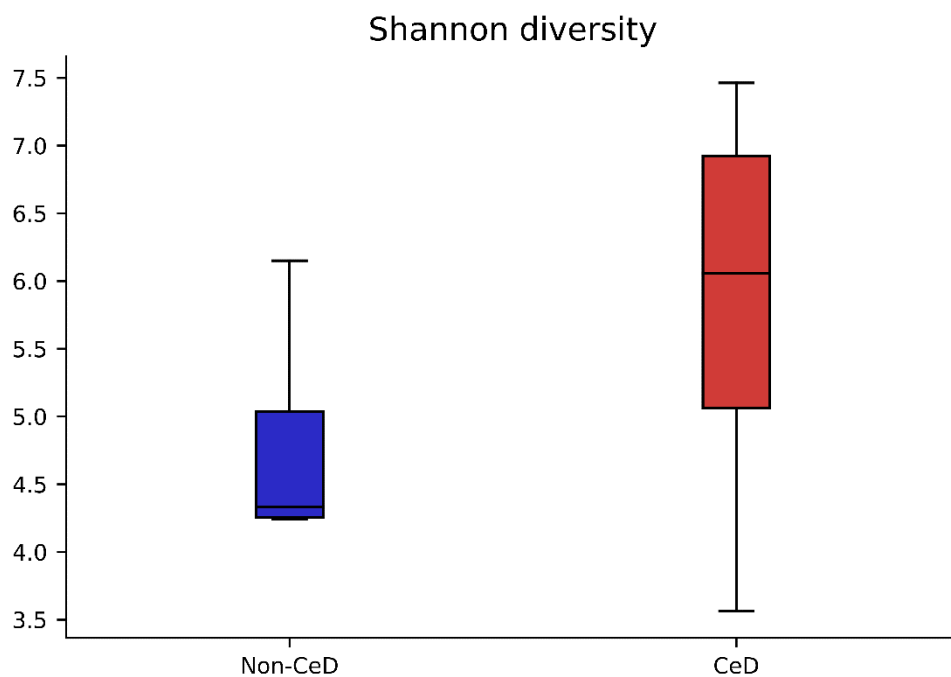

- b. Boxplot indicating Shannon diversity in TCR- $\beta$  repertoire samples from repertoire samples from CeD patients and non-CeD individuals. No significant difference in mean between the two groups was found (adjusted  $p = 0.294$ , unadjusted  $p = 0.0981$ )

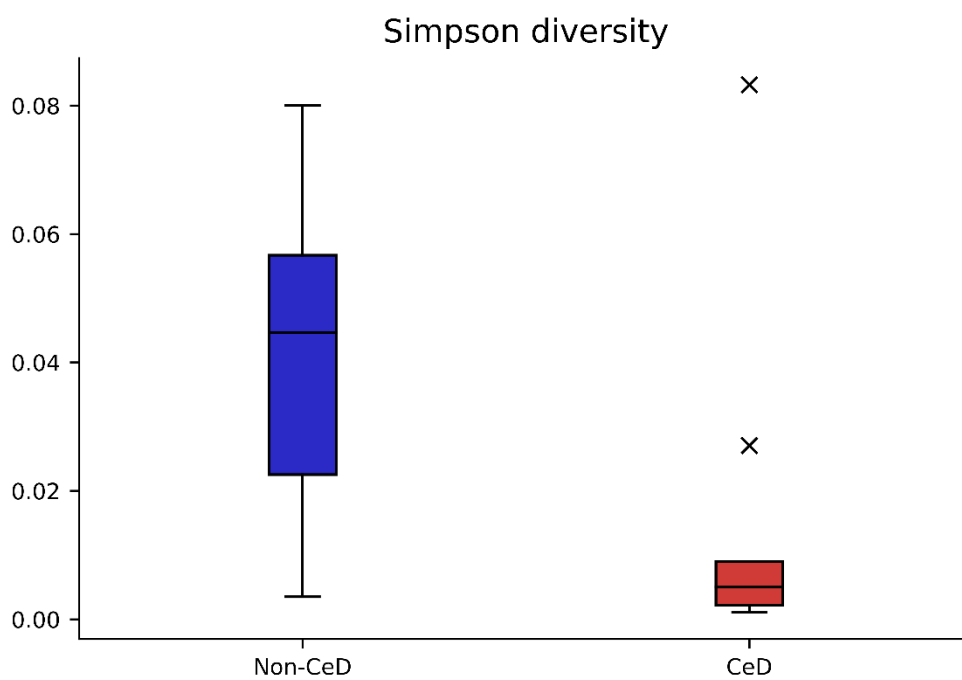

- c. Boxplot indicating Simpson diversity in TCR- $\beta$  repertoire samples from CeD patients and non-CeD individuals. No significant difference in mean between the two groups was found (adjusted  $p = 0.272$ , unadjusted  $p = 0.0908$ ).

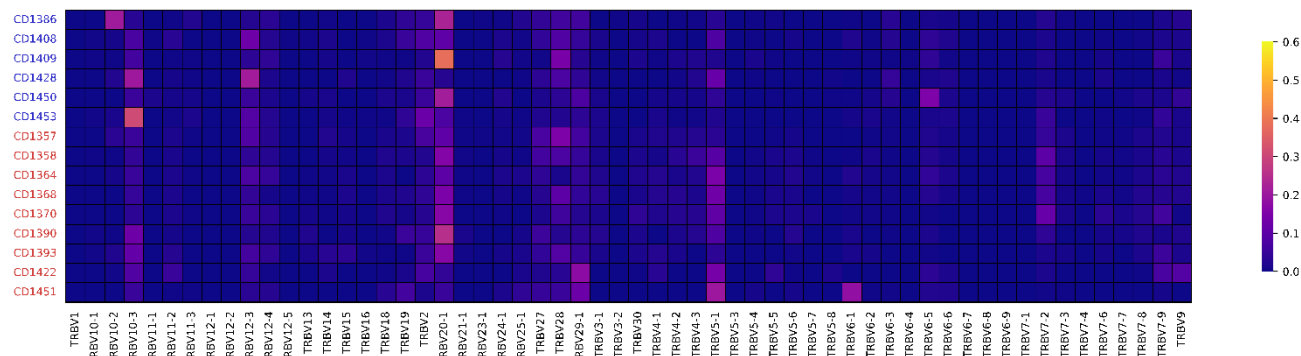

- d. Heatmap showing proportions of TCR- $\beta$  repertoire samples that use each V segment. No V segment shows significantly different mean usage between repertoire samples from CeD patients and non-CeD individuals.

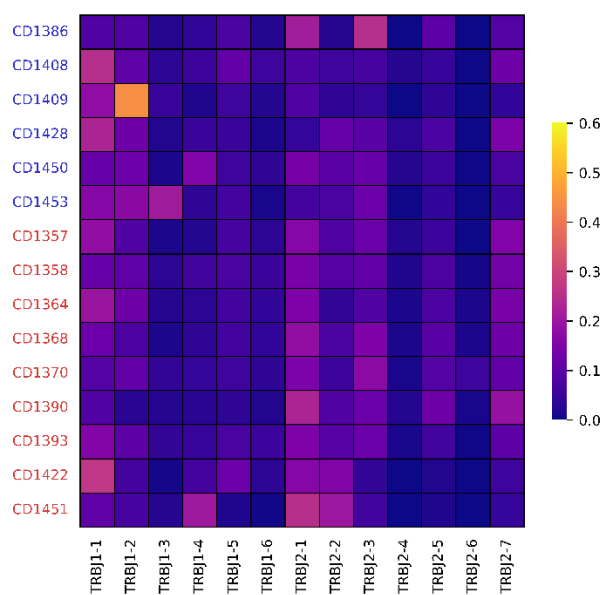

- e. Heatmap showing proportions of TCR- $\beta$  repertoire samples that use each J segment. No V segment shows significantly different mean usage between repertoire samples from CeD patients and non-CeD individuals.

## 1.6 Supplementary Figure S6: CD4<sup>+</sup> T cell sorting gate

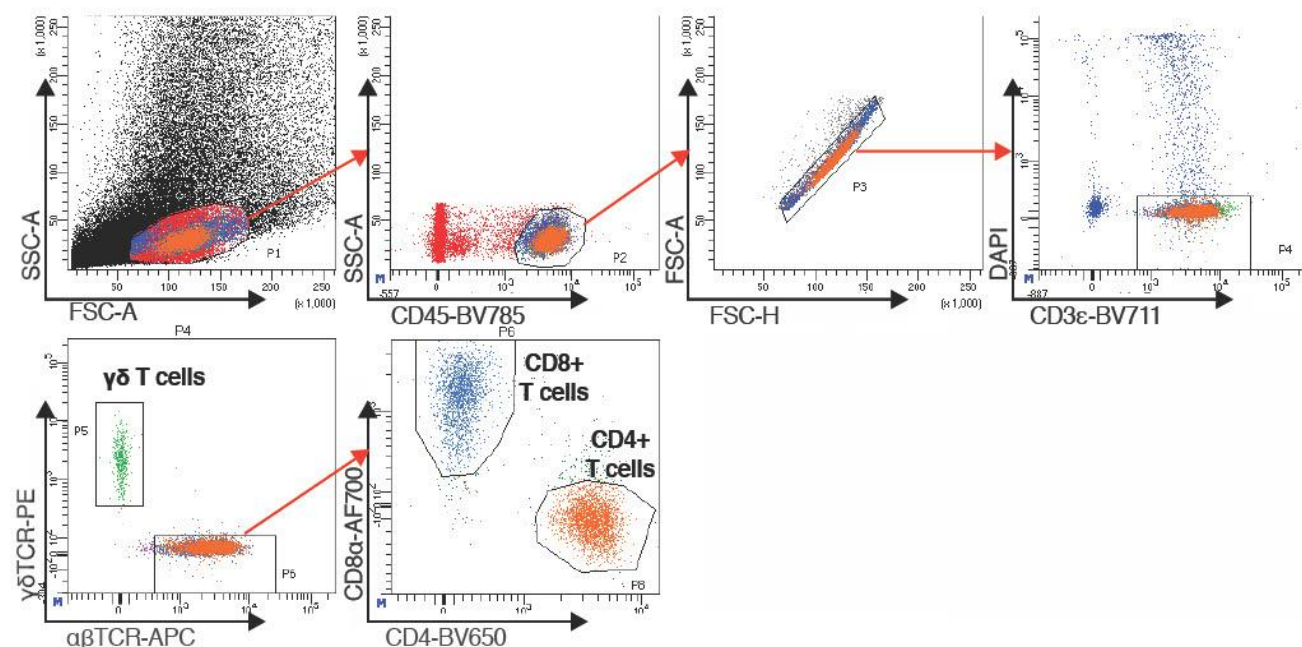

Representative gating strategy for FACS-sorting of intestinal T cell subsets (CD4<sup>+</sup>, CD8<sup>+</sup> and  $\gamma\delta$ <sup>+</sup>).

## 1.7 Supplementary Figure S7: Logo plots of TCR-alpha sequences included in the model

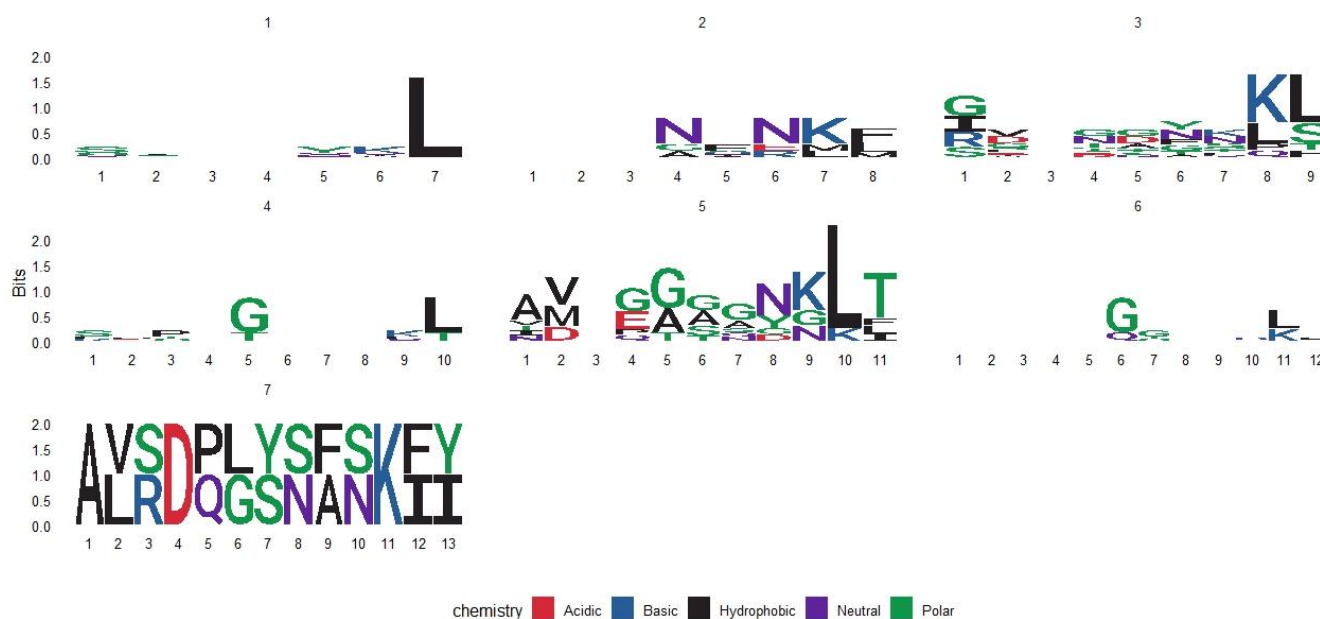

## 1.8 Supplementary Figure S8: Logo plots of TCR-beta sequences included in the model

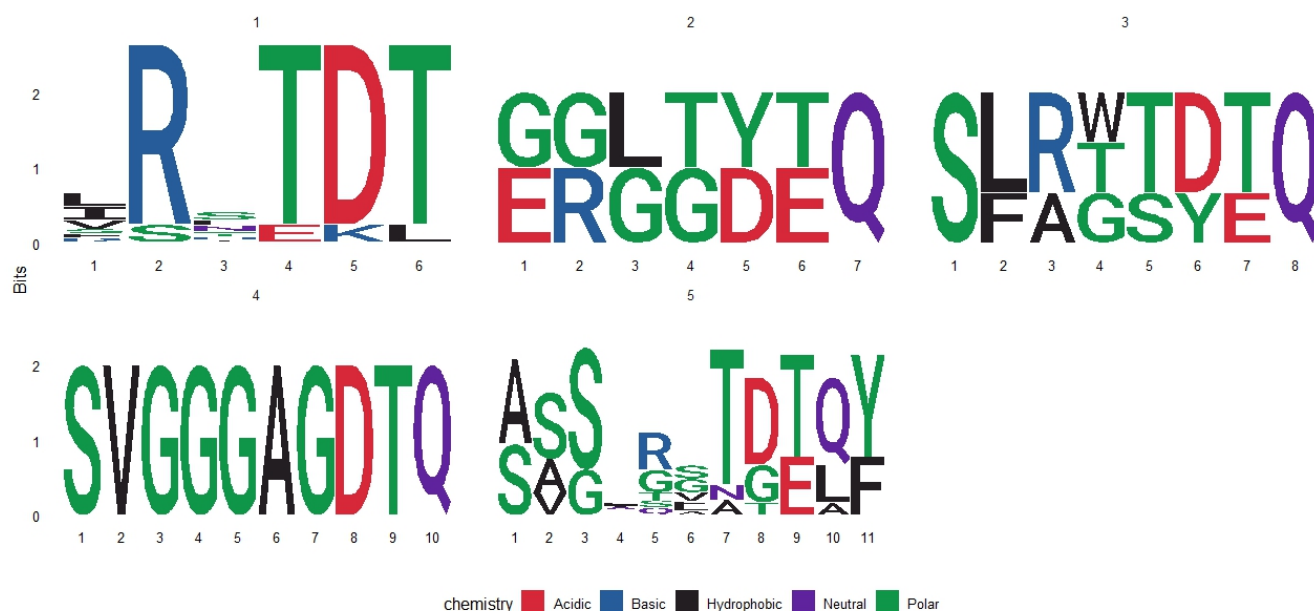



## 2 Supplementary Tables

### 2.1 Supplementary Table S1

|        | Age | Sex | Cohort  | IgA-TTG    | Marsh classification | HLA type |
|--------|-----|-----|---------|------------|----------------------|----------|
| GI2547 | 19  | F   | CeD     | 356        | Marsh 3              | NA       |
| GI2600 | 26  | F   | CeD     | 867        | Marsh 3              | NA       |
| GI2750 | 33  | F   | CeD     | 831        | Marsh 3              | DQ2      |
| GI2797 | 45  | F   | CeD     | 1301       | Marsh 3              | DQ2      |
| GI2798 | 27  | F   | CeD     | 789        | Marsh 3              | DQ2      |
| GI2894 | 20  | F   | CeD     | 1621       | Marsh 3              | DQ2      |
| GI2899 | 62  | F   | CeD     | 879        | Marsh 3              | DQ2      |
| GI2751 | 30  | F   | CeD-GFD | 16         | Marsh 1              | DQ2      |
| GI2799 | 41  | M   | CeD-GFD | 296        | Marsh 1              | DQ2      |
| GI2790 | 30  | F   | CeD-GFD | 17         | Marsh 1              | DQ2      |
| GI2898 | 57  | M   | CeD-GFD | <1.9       | Marsh 0              | DQ2      |
| GI2900 | 60  | F   | CeD-GFD | 83         | Marsh 0              | DQ8      |
| GI2484 | 63  | F   | Control | Not tested | Marsh 0              | NA       |
| GI2801 | 23  | M   | Control | Not tested | Marsh 0              | NA       |
| GI2874 | 33  | F   | Control | Not tested | Marsh 0              | DQ2      |
| GI3187 | 25  | F   | Control | Not tested | Marsh 0              | NA       |
| GI3369 | 25  | F   | Control | <1.9       | Marsh 0              | NA       |
| GI3370 | 26  | F   | Control | Not tested | Marsh 0              | DQ8      |
| GI3372 | 68  | F   | Control | <1.9       | Marsh 0              | DQ2      |
| GI3374 | 17  | F   | Control | <1.9       | Marsh 0              | DQ8      |

**Supplementary Table S1:** Patient characteristics for cohort 1 (training data set). All patients on a gluten free diet did not consume gluten for at least 6 months.

## 2.2 Supplementary Table S2

| Sequence           | Publication                 | Loci  | Pair (If provided)      |
|--------------------|-----------------------------|-------|-------------------------|
| YYCILRDGRGGADGLTFG | Broughton; 2012; Biased     | alpha | CASSVAVSAGTYEQYFG       |
| YYCILRDSRAQKLVFG   | Broughton; 2012; Biased     | alpha | CASSAGTSGEYEQYFG        |
| YYCILRDRSNQFYFG    | Broughton; 2012; Biased     | alpha | CASSTTPGTGTETQYFG       |
| YFCAYRSARGARLMFG   | Broughton; 2012; Biased     | alpha | CAS SVAVSAGTYEQ YFG     |
| YFCAGGSNTGKLIFG    | Broughton; 2012; Biased     | alpha | CAS SQDIRNTGEL FFG      |
| YFCATDFPGTASKLTFG  | Broughton; 2012; Biased     | alpha | CAS SEALPGRSGNTI YFG    |
| YFCAVGETGANNLFFG   | Broughton; 2012; Biased     | alpha | CAS SEARRYNEQ FGP       |
| YLCAVQASGGSYIPTFG  | Broughton; 2012; Biased     | alpha | CAS SNRGLGTDQ YFG       |
| YFCAASAYPGNQFYFG   | Broughton; 2012; Biased     | alpha | CAS SVYDGRGETQ YFG      |
| CASSVAVSAGTYEQYFG  | Broughton; 2012; Biased     | beta  | YYC ILRDGRGGADGLT FG    |
| CASSAGTSGEYEQYFG   | Broughton; 2012; Biased     | beta  | YYC ILRDSRAQKLV FG      |
| CASSTTPGTGTETQYFG  | Broughton; 2012; Biased     | beta  | YYC ILRDRSNQFY FG       |
| CASSVAVSAGTYEQYFG  | Broughton; 2012; Biased     | beta  | YFC AYRSARGARLM FG      |
| CASSQDIRNTGELFFG   | Broughton; 2012; Biased     | beta  | YFC AGGSNTGKLI FG       |
| CASSEALPGRSGNTIYFG | Broughton; 2012; Biased     | beta  | YFC ATDFPGTASKLT FG     |
| CASSEARRYNEQFGP    | Broughton; 2012; Biased     | beta  | YFC AVGETGANNLF FG      |
| CASSNRGLGTDQYFG    | Broughton; 2012; Biased     | beta  | YLC AVQASGGSYIPT FG     |
| CASSVYDGRGETQYFG   | Broughton; 2012; Biased     | beta  | YFC AASAYPGNQFY FG      |
| AVEAGSGGGADGLT     | Dahal-Koirala, 2019, immune | alpha | SASRTSGRAGDEQF          |
| AGQDYKYI           | Dahal-Koirala, 2019, immune | alpha | SASRTGGTDTQY            |
| AVIYQGGKLI         | Dahal-Koirala, 2019, immune | alpha | NO RESULTS              |
| AVRVEYNFNKFY       | Dahal-Koirala, 2019, immune | alpha | ASSQEGLADSYNEQF         |
| CLVGDSM#GATNKLIF   | Dahal-Koirala, 2019, immune | alpha | CSASRTSGRAGDEQFF        |
| AVESSWGKLO         | Dahal-Koirala, 2019, immune | alpha | SAARTSGRAGDTQY          |
| AVEAGSGGGADGLT     | Dahal-Koirala, 2019, immune | alpha | SASRTSGRAGDEQF          |
| AVGGEGFKTI         | Dahal-Koirala, 2019, immune | alpha | ASSEVGGPSHEQY           |
| ALNQGGKLI          | Dahal-Koirala, 2019, immune | alpha | SAARTSGRAGDTQY          |
| ALVARGYGNNRLA      | Dahal-Koirala, 2019, immune | alpha | SAARTSGRAGDTQY          |
| AVGGTDKLI          | Dahal-Koirala, 2019, immune | alpha | SASRTSGRAGDEQF          |
| AMSLTGANSKLT       | Dahal-Koirala, 2019, immune | alpha | ASSHIAGAGTDTQY          |
| SASRTSGRAGDEQF     | Dahal-Koirala, 2019, immune | beta  | AVEAGSGGGADGLT          |
| SASRTGGTDTQY       | Dahal-Koirala, 2019, immune | beta  | AGQDYKYI                |
| ASSQEGLADSYNEQF    | Dahal-Koirala, 2019, immune | beta  | AVRVEYNFNKFY            |
| CSASRTSGRAGDEQFF   | Dahal-Koirala, 2019, immune | beta  | CLVGDSM#GATNKLIF        |
| SAARTSGRAGDTQY     | Dahal-Koirala, 2019, immune | beta  | AVESSWGKLO              |
| SASRTSGRAGDEQF     | Dahal-Koirala, 2019, immune | beta  | AVEAGSGGGADGLT          |
| ASSEVGGPSHEQY      | Dahal-Koirala, 2019, immune | beta  | AVGGEGFKTI              |
| SAARTSGRAGDTQY     | Dahal-Koirala, 2019, immune | beta  | ALVARGYGNNRLA ALNQGGKLI |

|                 |                                 |       |                  |
|-----------------|---------------------------------|-------|------------------|
| SASRTSGRAGDEQF  | Dahal-Koirala, 2019, immune     | beta  | AVGGTDKLI        |
| ASSHIAGAGTDTQY  | Dahal-Koirala, 2019, immune     | beta  | AMSLTGANSKLT     |
| IVYGGFKTI       | Dahal-Koirala; 2016;TCR         | alpha | ASSLRSTDTQY      |
| LVGHGSSNTGKLI   | Dahal-Koirala; 2016;TCR         | alpha | ASSLRWGDGGKL     |
| IEYNFNKFY       | Dahal-Koirala; 2016;TCR         | alpha | ASRPVAG          |
| ALSELSIQGAQKLV  | Dahal-Koirala; 2016;TCR         | alpha | ASSIVDRGGETQY    |
| AGDSGYALN       | Dahal-Koirala; 2016;TCR         | alpha | ATSSRMGGDTQY     |
| IVPANTGGFKTI    | Dahal-Koirala; 2016;TCR         | alpha | ASSFRSTDTQY      |
| LVGGGADGLT      | Dahal-Koirala; 2016;TCR         | alpha | ASSVRTLDTGELF    |
| ALSESGANSKLT    | Dahal-Koirala; 2016;TCR         | alpha | ASSLRAWETQY      |
| AVRDPLYNFNKFY   | Dahal-Koirala; 2016;TCR         | alpha | ASSQGGDRGESEAF   |
| VVNSWAGNQFY     | Dahal-Koirala; 2016;TCR         | alpha | ASSLGYGVTGELF    |
| ASSLRSTDTQY     | Dahal-Koirala; 2016;TCR         | beta  | IVYGGFKTI        |
| ASSLRWGDGGKL    | Dahal-Koirala; 2016;TCR         | beta  | LVGHGSSNTGKLI    |
| ASRPVAG         | Dahal-Koirala; 2016;TCR         | beta  | IEYNFNKFY        |
| ASSIVDRGGETQY   | Dahal-Koirala; 2016;TCR         | beta  | ALSELSIQGAQKLV   |
| ATSSRMGGDTQY    | Dahal-Koirala; 2016;TCR         | beta  | AGDSGYALN        |
| ASSFRSTDTQY     | Dahal-Koirala; 2016;TCR         | beta  | IVPANTGGFKTI     |
| ASSVRTLDTGELF   | Dahal-Koirala; 2016;TCR         | beta  | LVGGGADGLT       |
| ASSLRAWETQY     | Dahal-Koirala; 2016;TCR         | beta  | ALSESGANSKLT     |
| ASSQGGDRGESEAF  | Dahal-Koirala; 2016;TCR         | beta  | AVRDPLYNFNKFY    |
| ASSLGYGVTGELF   | Dahal-Koirala; 2016;TCR         | beta  | VVNSWAGNQFY      |
| CILRDGRGGADGLTF | Peterson; 2015;<br>determinants | alpha | CASSVAVSAGTYEQYF |
| CILRDSRAQKLVF   | Peterson; 2015;<br>determinants | alpha | CASSAGTSGEYEYQF  |
| CILRDSRAQKLVF   | Peterson; 2015;<br>determinants | alpha | CASSVG VAGEYEYQF |
| CILRDRSNQFYF    | Peterson; 2015;<br>determinants | alpha | CASSTPGTGTETQYF  |
| CILRDDRGGKLIF   | Peterson; 2015;<br>determinants | alpha | CASSAGPQAGTQYF   |
| CILRGRDNYGQNFVF | Peterson; 2015;<br>determinants | alpha | CASSVESGISNNEQFF |
| CIVTGRGSTLGRLYF | Peterson; 2015;<br>determinants | alpha | CASSVEVSGNTIYF   |
| CIVHGRQTGANNLFF | Peterson; 2015;<br>determinants | alpha | CASSVEVSGNTIYF   |
| CIVRGRNAGMLTF   | Peterson; 2015;<br>determinants | alpha | CASSETLGNEQYF    |

|                  |                           |       |       |                   |
|------------------|---------------------------|-------|-------|-------------------|
| CIVRANLVGNTGKLIF | Peterson;<br>determinants | 2015; | alpha | CASSEGPLAKNIQY    |
| CAVGETGANNLFF    | Peterson;<br>determinants | 2015; | alpha | CASSEARRYNEQFF    |
| CAVGDTGANNLFF    | Peterson;<br>determinants | 2015; | alpha | CASSELRRYNEQFF    |
| CAVVNTGTASKLTF   | Peterson;<br>determinants | 2015; | alpha | CASSEGPTGRAGNTIYF |
| CATDFPGTASKLTF   | Peterson;<br>determinants | 2015; | alpha | CASSEALPGRSGNTIYF |
| CLVGDISGGYNKLIF  | Peterson;<br>determinants | 2015; | alpha | CASSEGLAVAKNIQYF  |
| CAVMVQGAQKLVF    | Peterson;<br>determinants | 2015; | alpha | CSASRAGDFSTDTQYF  |
| CAYRSARGARLMF    | Peterson;<br>determinants | 2015; | alpha | CASSVAVSAGTYEQYF  |
| CAGSSNTGKLIF     | Peterson;<br>determinants | 2015; | alpha | CASSQDIRNTGELFF   |
| CASSVAVSAGTYEQYF | Peterson;<br>determinants | 2015; | beta  | CILRDGRGGADGLTF   |
| CASSAGTSGEYEYF   | Peterson;<br>determinants | 2015; | beta  | CILRDSRAQKLVF     |
| CASSVGVAGEYEYF   | Peterson;<br>determinants | 2015; | beta  | CILRDSRAQKLVF     |
| CASSTPGTGTETQYF  | Peterson;<br>determinants | 2015; | beta  | CILRDRSNQYF       |
| CASSAGPQAGTQYF   | Peterson;<br>determinants | 2015; | beta  | CILRDDRGGKLIF     |
| CASSVESGISNNEQFF | Peterson;<br>determinants | 2015; | beta  | CILGRDNYGQNFVF    |
| CASSVEVSGNTIYF   | Peterson;<br>determinants | 2015; | beta  | CIVTGRGSTLGRLYF   |
| CASSVEVSGNTIYF   | Peterson;<br>determinants | 2015; | beta  | CIVHGRQTGANNLFF   |
| CASSETLGNEQYF    | Peterson;<br>determinants | 2015; | beta  | CIVRGRNAGMLTF     |
| CASSEGPLAKNIQY   | Peterson;<br>determinants | 2015; | beta  | CIVRANLVGNTGKLIF  |
| CASSEARRYNEQFF   | Peterson;<br>determinants | 2015; | beta  | CAVGETGANNLFF     |
| CASSELRRYNEQFF   | Peterson;<br>determinants | 2015; | beta  | CAVGDTGANNLFF     |

|                   |                               |       |                  |
|-------------------|-------------------------------|-------|------------------|
| CASSEGPTGRAGNTIYF | Peterson; 2015; determinants  | beta  | CAVVNTGTASKLTF   |
| CASSEALPGRSGNTIYF | Peterson; 2015; determinants  | beta  | CATDFPGTASKLTF   |
| CASSEGLAVAKNIQYF  | Peterson; 2015; determinants  | beta  | CLVGDGISGGYNKLIF |
| CSASRAGDFSTDTQYF  | Peterson; 2015; determinants  | beta  | CAVMVQGAQKLVF    |
| CASSVAVSAGTYEQYF  | Peterson; 2015; determinants  | beta  | CAYRSARGARLMF    |
| CASSQDIRNTGELFF   | Peterson; 2015; determinants  | beta  | CAGGSNTGKLIF     |
| LGDDTGfQKLv       | Rinses; 2018; disease-driving | alpha |                  |
| IAFNdyKLS         | Rinses; 2018; disease-driving | alpha |                  |
| ISFNdyKLS         | Rinses; 2018; disease-driving | alpha |                  |
| IVFNdyKLS         | Rinses; 2018; disease-driving | alpha |                  |
| IAYNdyKLS         | Rinses; 2018; disease-driving | alpha |                  |
| ISYNdyKLS         | Rinses; 2018; disease-driving | alpha |                  |
| IVYNdyKLS         | Rinses; 2018; disease-driving | alpha |                  |
| LVGGAGgYNkLI      | Rinses; 2018; disease-driving | alpha |                  |
| LVGGSGgYNkLI      | Rinses; 2018; disease-driving | alpha |                  |
| AMIEAAGNkLT       | Rinses; 2018; disease-driving | alpha |                  |
| AMLEAAGNkLT       | Rinses; 2018; disease-driving | alpha |                  |
| AMSEAAGNkLT       | Rinses; 2018; disease-driving | alpha |                  |
| AMIQAAGNkLT       | Rinses; 2018; disease-driving | alpha |                  |
| AMLQAAGNkLT       | Rinses; 2018; disease-driving | alpha |                  |
| AMQEAAGNkLT       | Rinses; 2018; disease-driving | alpha |                  |
| ASSxRxTDTQY       | Rinses; 2018; disease-driving | beta  |                  |
| SAGQGGTGELF       | Rinses; 2018; disease-driving | beta  |                  |
| SVGQGGTGELF       | Rinses; 2018; disease-driving | beta  |                  |
| SAGAGGTGELF       | Rinses; 2018; disease-driving | beta  |                  |
| SVGAGGTGELF       | Rinses; 2018; disease-driving | beta  |                  |
| SAGQGGSGELF       | Rinses; 2018; disease-driving | beta  |                  |
| SVGQGGSGELF       | Rinses; 2018; disease-driving | beta  |                  |
| SAGAGGSGELF       | Rinses; 2018; disease-driving | beta  |                  |
| SVGAGGSGELF       | Rinses; 2018; disease-driving | beta  |                  |
| LGQGVAGEL         | Hardy; 2019; Characterisation | beta  |                  |
| GGTGAGETQ         | Hardy; 2019; Characterisation | beta  |                  |

|             |                            |       |      |  |
|-------------|----------------------------|-------|------|--|
| SHIAGAGTDTQ | Hardy;<br>Characterisation | 2019; | beta |  |
| SFGSPHNEQ   | Hardy;<br>Characterisation | 2019; | beta |  |
| KESGLADVNEQ | Hardy;<br>Characterisation | 2019; | beta |  |
| SLRGKGGHEQ  | Hardy;<br>Characterisation | 2019; | beta |  |
| SLEITYRWDTQ | Hardy;<br>Characterisation | 2019; | beta |  |
| STQWGIDEKL  | Hardy;<br>Characterisation | 2019; | beta |  |
| SESDDRVTDTQ | Hardy;<br>Characterisation | 2019; | beta |  |
| SGQGDNEQ    | Hardy;<br>Characterisation | 2019; | beta |  |
| SLSLRNSGNTI | Hardy;<br>Characterisation | 2019; | beta |  |
| REQGWTEA    | Hardy;<br>Characterisation | 2019; | beta |  |
| GREQGWTEA   | Hardy;<br>Characterisation | 2019; | beta |  |
| NRGPDYGY    | Hardy;<br>Characterisation | 2019; | beta |  |
| TRDYRSNQPPQ | Hardy;<br>Characterisation | 2019; | beta |  |
| TRTYRYNEQ   | Hardy;<br>Characterisation | 2019; | beta |  |
| TTSWDEQ     | Hardy;<br>Characterisation | 2019; | beta |  |
| EGGNYGY     | Hardy;<br>Characterisation | 2019; | beta |  |
| SEVAGNTI    | Hardy;<br>Characterisation | 2019; | beta |  |
| NEVAGNTI    | Hardy;<br>Characterisation | 2019; | beta |  |
| SRTPGQGAYEQ | Hardy;<br>Characterisation | 2019; | beta |  |
| SRFPGIGVSEQ | Hardy;<br>Characterisation | 2019; | beta |  |
| SRTPGRGAYEQ | Hardy;<br>Characterisation | 2019; | beta |  |

|                  |                            |       |      |  |
|------------------|----------------------------|-------|------|--|
| SPTTSEGR IQ      | Hardy;<br>Characterisation | 2019; | beta |  |
| SPTASEGR IQ      | Hardy;<br>Characterisation | 2019; | beta |  |
| SQVYNFSPL        | Hardy;<br>Characterisation | 2019; | beta |  |
| SQVVAYEQ         | Hardy;<br>Characterisation | 2019; | beta |  |
| SQVYMYEQ         | Hardy;<br>Characterisation | 2019; | beta |  |
| SRTSENTGEL       | Hardy;<br>Characterisation | 2019; | beta |  |
| SHLAGAGTDTQ      | Hardy;<br>Characterisation | 2019; | beta |  |
| SQVLFYEQ         | Hardy;<br>Characterisation | 2019; | beta |  |
| S RTPW           | Hardy;<br>Characterisation | 2019; | beta |  |
| SFGIDTQ          | Hardy;<br>Characterisation | 2019; | beta |  |
| GGDAKNIQ         | Hardy;<br>Characterisation | 2019; | beta |  |
| SAQWVEQ          | Hardy;<br>Characterisation | 2019; | beta |  |
| SLWPPGQGSETQ     | Hardy;<br>Characterisation | 2019; | beta |  |
| GTSGRVITDTQ      | Hardy;<br>Characterisation | 2019; | beta |  |
| SQDLAWTLGGRGHNEQ | Hardy;<br>Characterisation | 2019; | beta |  |
| SPLGLAGAYEQ      | Hardy;<br>Characterisation | 2019; | beta |  |
| SITGSGEL         | Hardy;<br>Characterisation | 2019; | beta |  |
| KTPAPTYEQ        | Hardy;<br>Characterisation | 2019; | beta |  |
| SREWETQ          | Hardy;<br>Characterisation | 2019; | beta |  |
| GRLTDTQ          | Hardy;<br>Characterisation | 2019; | beta |  |
| SIVTGGWGIQ       | Hardy;<br>Characterisation | 2019; | beta |  |

|               |                            |       |      |  |
|---------------|----------------------------|-------|------|--|
| SRTSGRAGDEQ   | Hardy;<br>Characterisation | 2019; | beta |  |
| ARTSGRAGDEQ   | Hardy;<br>Characterisation | 2019; | beta |  |
| SLLAGGFYEQ    | Hardy;<br>Characterisation | 2019; | beta |  |
| GKLGLDTQ      | Hardy;<br>Characterisation | 2019; | beta |  |
| SLAKQGVYEQ    | Hardy;<br>Characterisation | 2019; | beta |  |
| SFWSQDTI      | Hardy;<br>Characterisation | 2019; | beta |  |
| EAGAYEQ       | Hardy;<br>Characterisation | 2019; | beta |  |
| RWPLTGLPFLDTQ | Hardy;<br>Characterisation | 2019; | beta |  |
| DRLTDTQ       | Hardy;<br>Characterisation | 2019; | beta |  |
| QDRPGEQ       | Hardy;<br>Characterisation | 2019; | beta |  |
| SEAYRYEQ      | Hardy;<br>Characterisation | 2019; | beta |  |
| TRSGTIGDTQ    | Hardy;<br>Characterisation | 2019; | beta |  |
| SQVYMYEQ      | Hardy;<br>Characterisation | 2019; | beta |  |
| SVGAQGGEQ     | Hardy;<br>Characterisation | 2019; | beta |  |
| SPPDRNTEA     | Hardy;<br>Characterisation | 2019; | beta |  |
| EGGNYGY       | Hardy;<br>Characterisation | 2019; | beta |  |
| AQGWGYEQ      | Hardy;<br>Characterisation | 2019; | beta |  |
| SKQGGTATNEKL  | Hardy;<br>Characterisation | 2019; | beta |  |
| SFGQGSTEa     | Hardy;<br>Characterisation | 2019; | beta |  |
| SLQGGETQ      | Hardy;<br>Characterisation | 2019; | beta |  |
| SPPXGGAAEA    | Hardy;<br>Characterisation | 2019; | beta |  |



|               |                            |       |      |  |
|---------------|----------------------------|-------|------|--|
| HGIERGPEETQ   | Hardy;<br>Characterisation | 2019; | beta |  |
| EAGTAYAYNSPL  | Hardy;<br>Characterisation | 2019; | beta |  |
| ARTSGRAGDTQ   | Hardy;<br>Characterisation | 2019; | beta |  |
| SSLGPDQPQ     | Hardy;<br>Characterisation | 2019; | beta |  |
| GLAKNIQ       | Hardy;<br>Characterisation | 2019; | beta |  |
| SEAYRYEQ      | Hardy;<br>Characterisation | 2019; | beta |  |
| SLNVVTYNSPL   | Hardy;<br>Characterisation | 2019; | beta |  |
| SQAGGLFNSPL   | Hardy;<br>Characterisation | 2019; | beta |  |
| SFSAGTTEA     | Hardy;<br>Characterisation | 2019; | beta |  |
| VDSVTYEQ      | Hardy;<br>Characterisation | 2019; | beta |  |
| EGGGYEQ       | Hardy;<br>Characterisation | 2019; | beta |  |
| ILWGIGTGTDTQ  | Hardy;<br>Characterisation | 2019; | beta |  |
| SHIAGAGTDTQ   | Hardy;<br>Characterisation | 2019; | beta |  |
| SSGQPTTDTQ    | Hardy;<br>Characterisation | 2019; | beta |  |
| SFGGPYNEQ     | Hardy;<br>Characterisation | 2019; | beta |  |
| SWLAGGPEETQ   | Hardy;<br>Characterisation | 2019; | beta |  |
| SSDAYTGEL     | Hardy;<br>Characterisation | 2019; | beta |  |
| SPRAGASGHTGEL | Hardy;<br>Characterisation | 2019; | beta |  |
| SIFLGIRNQPP   | Hardy;<br>Characterisation | 2019; | beta |  |
| SEWGLQGNEQ    | Hardy;<br>Characterisation | 2019; | beta |  |
| SLGTVSNYGY    | Hardy;<br>Characterisation | 2019; | beta |  |

|               |                            |       |       |  |
|---------------|----------------------------|-------|-------|--|
| RRAGWETEA     | Hardy;<br>Characterisation | 2019; | beta  |  |
| ARTSGRAGDEQ   | Hardy;<br>Characterisation | 2019; | beta  |  |
| SQSRGTFTHHSEA | Hardy;<br>Characterisation | 2019; | beta  |  |
| TPRGGNQPQ     | Hardy;<br>Characterisation | 2019; | beta  |  |
| RVAGYNEQ      | Hardy;<br>Characterisation | 2019; | beta  |  |
| TVMDSSYKL     | Hardy;<br>Characterisation | 2019; | alpha |  |
| SIVGYQL       | Hardy;<br>Characterisation | 2019; | alpha |  |
| DYGGATNKL     | Hardy;<br>Characterisation | 2019; | alpha |  |
| SDNWWYGGATNKL | Hardy;<br>Characterisation | 2019; | alpha |  |
| RAFGNEKL      | Hardy;<br>Characterisation | 2019; | alpha |  |
| NGGNYGQNF     | Hardy;<br>Characterisation | 2019; | alpha |  |
| TPRGYAL       | Hardy;<br>Characterisation | 2019; | alpha |  |
| NPGGAGGTSYGKL | Hardy;<br>Characterisation | 2019; | alpha |  |
| IILTGGGNKL    | Hardy;<br>Characterisation | 2019; | alpha |  |
| SRTSGSARQL    | Hardy;<br>Characterisation | 2019; | alpha |  |
| SIGNYQL       | Hardy;<br>Characterisation | 2019; | alpha |  |
| NRKTSYDKV     | Hardy;<br>Characterisation | 2019; | alpha |  |
| SLTGANSKL     | Hardy;<br>Characterisation | 2019; | alpha |  |
| SADQTGANNL    | Hardy;<br>Characterisation | 2019; | alpha |  |
| KTNDYKL       | Hardy;<br>Characterisation | 2019; | alpha |  |
| SGGTGGFKT     | Hardy;<br>Characterisation | 2019; | alpha |  |

|              |                            |       |       |  |
|--------------|----------------------------|-------|-------|--|
| RASEYGNKL    | Hardy;<br>Characterisation | 2019; | alpha |  |
| SARSGSNYKL   | Hardy;<br>Characterisation | 2019; | alpha |  |
| QLPMNRDDKI   | Hardy;<br>Characterisation | 2019; | alpha |  |
| GDPYTGGGNKL  | Hardy;<br>Characterisation | 2019; | alpha |  |
| EGNYGQNF     | Hardy;<br>Characterisation | 2019; | alpha |  |
| EGNTGFQKL    | Hardy;<br>Characterisation | 2019; | alpha |  |
| SANFGFGNEKL  | Hardy;<br>Characterisation | 2019; | alpha |  |
| SSVYSGGGADGL | Hardy;<br>Characterisation | 2019; | alpha |  |
| NAPHGGSQGNL  | Hardy;<br>Characterisation | 2019; | alpha |  |
| DINAGNML     | Hardy;<br>Characterisation | 2019; | alpha |  |
| PLNTGFQKL    | Hardy;<br>Characterisation | 2019; | alpha |  |
| SGTGTASKL    | Hardy;<br>Characterisation | 2019; | alpha |  |
| KGGTNQF      | Hardy;<br>Characterisation | 2019; | alpha |  |
| SEAGYGGATNKL | Hardy;<br>Characterisation | 2019; | alpha |  |
| YQGGKL       | Hardy;<br>Characterisation | 2019; | alpha |  |
| RLVEYGNKL    | Hardy;<br>Characterisation | 2019; | alpha |  |
| RVPNTGFQKL   | Hardy;<br>Characterisation | 2019; | alpha |  |
| RFPVYGGNQGNL | Hardy;<br>Characterisation | 2019; | alpha |  |
| SSRSDGQKL    | Hardy;<br>Characterisation | 2019; | alpha |  |
| RPPTQGGSEKL  | Hardy;<br>Characterisation | 2019; | alpha |  |
| MNYGGGTNKL   | Hardy;<br>Characterisation | 2019; | alpha |  |

|               |                            |       |       |  |
|---------------|----------------------------|-------|-------|--|
| FMPPGNQF      | Hardy;<br>Characterisation | 2019; | alpha |  |
| RTGANNL       | Hardy;<br>Characterisation | 2019; | alpha |  |
| SVRTSGTYKY    | Hardy;<br>Characterisation | 2019; | alpha |  |
| SAGTGTASKL    | Hardy;<br>Characterisation | 2019; | alpha |  |
| ENTSYGKL      | Hardy;<br>Characterisation | 2019; | alpha |  |
| MKHRGFGNKL    | Hardy;<br>Characterisation | 2019; | alpha |  |
| MKQRGFGNVL    | Hardy;<br>Characterisation | 2019; | alpha |  |
| RPYNAGNML     | Hardy;<br>Characterisation | 2019; | alpha |  |
| WNTDKL        | Hardy;<br>Characterisation | 2019; | alpha |  |
| SITGYAL       | Hardy;<br>Characterisation | 2019; | alpha |  |
| GPGTASKL      | Hardy;<br>Characterisation | 2019; | alpha |  |
| SERGSNDYKL    | Hardy;<br>Characterisation | 2019; | alpha |  |
| NPGGAGGTSYGKL | Hardy;<br>Characterisation | 2019; | alpha |  |
| NDAGGTSYGKL   | Hardy;<br>Characterisation | 2019; | alpha |  |
| FILTGGGNKL    | Hardy;<br>Characterisation | 2019; | alpha |  |
| ETGFQKL       | Hardy;<br>Characterisation | 2019; | alpha |  |
| GYNKL         | Hardy;<br>Characterisation | 2019; | alpha |  |
| SNDYKL        | Hardy;<br>Characterisation | 2019; | alpha |  |
| RPSEYGNKL     | Hardy;<br>Characterisation | 2019; | alpha |  |
| RASEYGNKL     | Hardy;<br>Characterisation | 2019; | alpha |  |
| EKL           | Hardy;<br>Characterisation | 2019; | alpha |  |

|              |                            |       |       |  |
|--------------|----------------------------|-------|-------|--|
| AQXRGGATNKL  | Hardy;<br>Characterisation | 2019; | alpha |  |
| AQLRGGATNKL  | Hardy;<br>Characterisation | 2019; | alpha |  |
| DPGGFKT      | Hardy;<br>Characterisation | 2019; | alpha |  |
| PPPVGRL      | Hardy;<br>Characterisation | 2019; | alpha |  |
| DPQGAQKL     | Hardy;<br>Characterisation | 2019; | alpha |  |
| NTGKL        | Hardy;<br>Characterisation | 2019; | alpha |  |
| RSDPPNFGNEKL | Hardy;<br>Characterisation | 2019; | alpha |  |
| GDGGATNKL    | Hardy;<br>Characterisation | 2019; | alpha |  |
| ALDSNYQL     | Hardy;<br>Characterisation | 2019; | alpha |  |
| SALIGGGADGL  | Hardy;<br>Characterisation | 2019; | alpha |  |
| ADKL         | Hardy;<br>Characterisation | 2019; | alpha |  |
| NEGRL        | Hardy;<br>Characterisation | 2019; | alpha |  |
| PSGSSASKI    | Hardy;<br>Characterisation | 2019; | alpha |  |
| SLTGGGADGL   | Hardy;<br>Characterisation | 2019; | alpha |  |
| RWSTGTASKL   | Hardy;<br>Characterisation | 2019; | alpha |  |
| NPWKAGGSEKL  | Hardy;<br>Characterisation | 2019; | alpha |  |
| DGSTLGRL     | Hardy;<br>Characterisation | 2019; | alpha |  |
| DNDM         | Hardy;<br>Characterisation | 2019; | alpha |  |
| PNNAGNML     | Hardy;<br>Characterisation | 2019; | alpha |  |
| RLPTSGSARQL  | Hardy;<br>Characterisation | 2019; | alpha |  |
| PGPGTYKY     | Hardy;<br>Characterisation | 2019; | alpha |  |

|                |                            |       |       |  |
|----------------|----------------------------|-------|-------|--|
| RLPEYGNKL      | Hardy;<br>Characterisation | 2019; | alpha |  |
| RRTSGSRL       | Hardy;<br>Characterisation | 2019; | alpha |  |
| GVNTGGFKT      | Hardy;<br>Characterisation | 2019; | alpha |  |
| TDYNARL        | Hardy;<br>Characterisation | 2019; | alpha |  |
| IQGAQKL        | Hardy;<br>Characterisation | 2019; | alpha |  |
| SEHLLRTEA      | Hardy;<br>Characterisation | 2019; | beta  |  |
| SRNRDRGL       | Hardy;<br>Characterisation | 2019; | beta  |  |
| SRGLDLLGEQ     | Hardy;<br>Characterisation | 2019; | beta  |  |
| SRLGVGQETQ     | Hardy;<br>Characterisation | 2019; | beta  |  |
| SQGWASGFGNTGEL | Hardy;<br>Characterisation | 2019; | beta  |  |
| SLGHS GTIDGY   | Hardy;<br>Characterisation | 2019; | beta  |  |
| SFFQLGDTQ      | Hardy;<br>Characterisation | 2019; | beta  |  |
| STNGGNYEQ      | Hardy;<br>Characterisation | 2019; | beta  |  |
| SLQPHLTATYEQ   | Hardy;<br>Characterisation | 2019; | beta  |  |
| SLAREYSGNTI    | Hardy;<br>Characterisation | 2019; | beta  |  |
| SFFLRDGY       | Hardy;<br>Characterisation | 2019; | beta  |  |
| SEANGEL        | Hardy;<br>Characterisation | 2019; | beta  |  |
| KESGLADVNEQ    | Hardy;<br>Characterisation | 2019; | beta  |  |
| SQWGQGEGEQ     | Hardy;<br>Characterisation | 2019; | beta  |  |
| SFSASDSYEQ     | Hardy;<br>Characterisation | 2019; | beta  |  |
| SLSFDYEQ       | Hardy;<br>Characterisation | 2019; | beta  |  |

|             |                            |       |      |  |
|-------------|----------------------------|-------|------|--|
| SPGQGGYNEQ  | Hardy;<br>Characterisation | 2019; | beta |  |
| SLAGSYEQ    | Hardy;<br>Characterisation | 2019; | beta |  |
| SPGQGPYGY   | Hardy;<br>Characterisation | 2019; | beta |  |
| SLAGTLPNEQ  | Hardy;<br>Characterisation | 2019; | beta |  |
| SLLAGGDTQ   | Hardy;<br>Characterisation | 2019; | beta |  |
| SWAVGSNEQ   | Hardy;<br>Characterisation | 2019; | beta |  |
| GSIAGGTIEQ  | Hardy;<br>Characterisation | 2019; | beta |  |
| SPWGGGTQ    | Hardy;<br>Characterisation | 2019; | beta |  |
| SSTGLYQETQ  | Hardy;<br>Characterisation | 2019; | beta |  |
| SESDDRVTDTQ | Hardy;<br>Characterisation | 2019; | beta |  |
| SFSPAGGGTQ  | Hardy;<br>Characterisation | 2019; | beta |  |
| SISWTIEQ    | Hardy;<br>Characterisation | 2019; | beta |  |
| GRLGPYNEQ   | Hardy;<br>Characterisation | 2019; | beta |  |
| GGASRGYGY   | Hardy;<br>Characterisation | 2019; | beta |  |
| SPGGEKL     | Hardy;<br>Characterisation | 2019; | beta |  |
| NPGGGAVG    | Hardy;<br>Characterisation | 2019; | beta |  |
| EEGADSPL    | Hardy;<br>Characterisation | 2019; | beta |  |
| SGRRGTDQ    | Hardy;<br>Characterisation | 2019; | beta |  |
| GRPDSPL     | Hardy;<br>Characterisation | 2019; | beta |  |
| SVGPGGEQ    | Hardy;<br>Characterisation | 2019; | beta |  |
| WRSYGY      | Hardy;<br>Characterisation | 2019; | beta |  |

|              |                            |       |      |  |
|--------------|----------------------------|-------|------|--|
| SLRGAVLAPYEQ | Hardy;<br>Characterisation | 2019; | beta |  |
| TPIQGAGGY    | Hardy;<br>Characterisation | 2019; | beta |  |
| SSLQRHEQ     | Hardy;<br>Characterisation | 2019; | beta |  |
| SLLQRYEQ     | Hardy;<br>Characterisation | 2019; | beta |  |
| SLVGQGRSEQ   | Hardy;<br>Characterisation | 2019; | beta |  |
| RTGEWETQ     | Hardy;<br>Characterisation | 2019; | beta |  |
| SPSGGSTDTQ   | Hardy;<br>Characterisation | 2019; | beta |  |
| EFWGGNTEA    | Hardy;<br>Characterisation | 2019; | beta |  |
| RTGEWETQ     | Hardy;<br>Characterisation | 2019; | beta |  |
| SVSLGSVNTEA  | Hardy;<br>Characterisation | 2019; | beta |  |
| STLTGDYEQ    | Hardy;<br>Characterisation | 2019; | beta |  |
| SSVPGGEQ     | Hardy;<br>Characterisation | 2019; | beta |  |
| SLAGLYEQ     | Hardy;<br>Characterisation | 2019; | beta |  |
| SISAVSTDQ    | Hardy;<br>Characterisation | 2019; | beta |  |
| SISAVSTDQ    | Hardy;<br>Characterisation | 2019; | beta |  |
| SLRVSQPQ     | Hardy;<br>Characterisation | 2019; | beta |  |
| RRGTGDYEQ    | Hardy;<br>Characterisation | 2019; | beta |  |
| SLGQGTTQ     | Hardy;<br>Characterisation | 2019; | beta |  |
| STRTGNEQ     | Hardy;<br>Characterisation | 2019; | beta |  |
| SPSGQGEYEQ   | Hardy;<br>Characterisation | 2019; | beta |  |
| SPSGQGEYEQ   | Hardy;<br>Characterisation | 2019; | beta |  |



|               |                            |       |      |  |
|---------------|----------------------------|-------|------|--|
| SLEGTDTQ      | Hardy;<br>Characterisation | 2019; | beta |  |
| SLVGAGDGTDTQ  | Hardy;<br>Characterisation | 2019; | beta |  |
| STGDPGEL      | Hardy;<br>Characterisation | 2019; | beta |  |
| SVGGGAGDTQ    | Hardy;<br>Characterisation | 2019; | beta |  |
| SPTLGCEL      | Hardy;<br>Characterisation | 2019; | beta |  |
| YAGLPGDEQ     | Hardy;<br>Characterisation | 2019; | beta |  |
| SYAGLPGDEQ    | Hardy;<br>Characterisation | 2019; | beta |  |
| SPGTTRSGEL    | Hardy;<br>Characterisation | 2019; | beta |  |
| SQVNRHTEA     | Hardy;<br>Characterisation | 2019; | beta |  |
| SRLGVGQETQ    | Hardy;<br>Characterisation | 2019; | beta |  |
| SFGLRDTGEL    | Hardy;<br>Characterisation | 2019; | beta |  |
| TLLAGGGGDTQ   | Hardy;<br>Characterisation | 2019; | beta |  |
| SLGGDSYEQ     | Hardy;<br>Characterisation | 2019; | beta |  |
| SFGTTNEKL     | Hardy;<br>Characterisation | 2019; | beta |  |
| SKGQGALLSSYEQ | Hardy;<br>Characterisation | 2019; | beta |  |
| SLIPYNEQ      | Hardy;<br>Characterisation | 2019; | beta |  |
| SRS GGAWADTQ  | Hardy;<br>Characterisation | 2019; | beta |  |
| SIAWTGHVDGY   | Hardy;<br>Characterisation | 2019; | beta |  |
| TTGGSEKL      | Hardy;<br>Characterisation | 2019; | beta |  |
| GPGGDSYEQ     | Hardy;<br>Characterisation | 2019; | beta |  |
| ILGGDSYEQ     | Hardy;<br>Characterisation | 2019; | beta |  |

|               |                            |       |      |  |
|---------------|----------------------------|-------|------|--|
| GGAQKGYGY     | Hardy;<br>Characterisation | 2019; | beta |  |
| AGTGIGY       | Hardy;<br>Characterisation | 2019; | beta |  |
| GSQGDTEA      | Hardy;<br>Characterisation | 2019; | beta |  |
| REGIDTEA      | Hardy;<br>Characterisation | 2019; | beta |  |
| EQGWDSAEA     | Hardy;<br>Characterisation | 2019; | beta |  |
| SSNEKL        | Hardy;<br>Characterisation | 2019; | beta |  |
| RGWDTEA       | Hardy;<br>Characterisation | 2019; | beta |  |
| GQADTEA       | Hardy;<br>Characterisation | 2019; | beta |  |
| GEALGETQ      | Hardy;<br>Characterisation | 2019; | beta |  |
| ETSRGHEQ      | Hardy;<br>Characterisation | 2019; | beta |  |
| SEVAGGEQ      | Hardy;<br>Characterisation | 2019; | beta |  |
| SQEAPGQGYGQPQ | Hardy;<br>Characterisation | 2019; | beta |  |
| SRTGIWDEQ     | Hardy;<br>Characterisation | 2019; | beta |  |
| SQDLTDSPL     | Hardy;<br>Characterisation | 2019; | beta |  |
| SQDLTDSPL     | Hardy;<br>Characterisation | 2019; | beta |  |
| SFGPLGSEA     | Hardy;<br>Characterisation | 2019; | beta |  |
| RGSDYEQ       | Hardy;<br>Characterisation | 2019; | beta |  |
| SVGGGAGDTQ    | Hardy;<br>Characterisation | 2019; | beta |  |
| SVGGPYNEQ     | Hardy;<br>Characterisation | 2019; | beta |  |
| SPWTSGYNQDTQ  | Hardy;<br>Characterisation | 2019; | beta |  |
| SLLGQAGY      | Hardy;<br>Characterisation | 2019; | beta |  |

|              |                            |       |      |  |
|--------------|----------------------------|-------|------|--|
| SLTGARTDTQ   | Hardy;<br>Characterisation | 2019; | beta |  |
| SAGISEEAG    | Hardy;<br>Characterisation | 2019; | beta |  |
| SIAWVETQ     | Hardy;<br>Characterisation | 2019; | beta |  |
| GGTAGSNYGY   | Hardy;<br>Characterisation | 2019; | beta |  |
| FKGGDTEA     | Hardy;<br>Characterisation | 2019; | beta |  |
| RDLRTEA      | Hardy;<br>Characterisation | 2019; | beta |  |
| GRLTDTQ      | Hardy;<br>Characterisation | 2019; | beta |  |
| RRTFGQETQ    | Hardy;<br>Characterisation | 2019; | beta |  |
| AVGGDSYEQ    | Hardy;<br>Characterisation | 2019; | beta |  |
| SQGVEA       | Hardy;<br>Characterisation | 2019; | beta |  |
| RAGVDTEA     | Hardy;<br>Characterisation | 2019; | beta |  |
| SALQGASYEQ   | Hardy;<br>Characterisation | 2019; | beta |  |
| NSGWDGEL     | Hardy;<br>Characterisation | 2019; | beta |  |
| GYGLGETQ     | Hardy;<br>Characterisation | 2019; | beta |  |
| GGGYDQPQ     | Hardy;<br>Characterisation | 2019; | beta |  |
| SAGGWDTGEL   | Hardy;<br>Characterisation | 2019; | beta |  |
| SGQGGRA      | Hardy;<br>Characterisation | 2019; | beta |  |
| SSLQGRDGY    | Hardy;<br>Characterisation | 2019; | beta |  |
| SLFLAGNRSYEQ | Hardy;<br>Characterisation | 2019; | beta |  |
| RNRGQASYEQ   | Hardy;<br>Characterisation | 2019; | beta |  |
| SVGLQVSAETQ  | Hardy;<br>Characterisation | 2019; | beta |  |

|              |                            |       |       |  |
|--------------|----------------------------|-------|-------|--|
| SSWGQGESPL   | Hardy;<br>Characterisation | 2019; | beta  |  |
| SLRGGQGGETQ  | Hardy;<br>Characterisation | 2019; | beta  |  |
| SSFRNTEA     | Hardy;<br>Characterisation | 2019; | beta  |  |
| SLAYSGYGY    | Hardy;<br>Characterisation | 2019; | beta  |  |
| SHGQDTEA     | Hardy;<br>Characterisation | 2019; | beta  |  |
| SLRGGQGGEKL  | Hardy;<br>Characterisation | 2019; | beta  |  |
| SPGQGAYGY    | Hardy;<br>Characterisation | 2019; | beta  |  |
| AREGTDQ      | Hardy;<br>Characterisation | 2019; | beta  |  |
| SSRGTDQ      | Hardy;<br>Characterisation | 2019; | beta  |  |
| SQGQDTEA     | Hardy;<br>Characterisation | 2019; | beta  |  |
| SLLAGGDTQ    | Hardy;<br>Characterisation | 2019; | alpha |  |
| SERVGGFGY    | Hardy;<br>Characterisation | 2019; | alpha |  |
| SELSSVWDEKL  | Hardy;<br>Characterisation | 2019; | alpha |  |
| SPVGAYEQ     | Hardy;<br>Characterisation | 2019; | alpha |  |
| TRQSPADTQ    | Hardy;<br>Characterisation | 2019; | alpha |  |
| REESGYSTL    | Hardy;<br>Characterisation | 2019; | alpha |  |
| RAVISGGYNKL  | Hardy;<br>Characterisation | 2019; | alpha |  |
| RAVLSSGGYNKL | Hardy;<br>Characterisation | 2019; | alpha |  |
| SRVQAGTAL    | Hardy;<br>Characterisation | 2019; | alpha |  |
| RSISGNTPL    | Hardy;<br>Characterisation | 2019; | alpha |  |
| GDDTGFQKL    | Hardy;<br>Characterisation | 2019; | alpha |  |

|               |                            |       |       |  |
|---------------|----------------------------|-------|-------|--|
| GDSRGGKL      | Hardy;<br>Characterisation | 2019; | alpha |  |
| GDVDYNQGGKL   | Hardy;<br>Characterisation | 2019; | alpha |  |
| GDGAAGNKL     | Hardy;<br>Characterisation | 2019; | alpha |  |
| SSQLGGKL      | Hardy;<br>Characterisation | 2019; | alpha |  |
| AVGVEDSGNTPL  | Hardy;<br>Characterisation | 2019; | alpha |  |
| SVYSSASKI     | Hardy;<br>Characterisation | 2019; | alpha |  |
| APNQAGTAL     | Hardy;<br>Characterisation | 2019; | alpha |  |
| REDTGRRAL     | Hardy;<br>Characterisation | 2019; | alpha |  |
| TGGFKT        | Hardy;<br>Characterisation | 2019; | alpha |  |
| SDNWWYGGATNKL | Hardy;<br>Characterisation | 2019; | alpha |  |
| GGYGGSQGNL    | Hardy;<br>Characterisation | 2019; | alpha |  |
| SIGNYQL       | Hardy;<br>Characterisation | 2019; | alpha |  |
| DANYGQNF      | Hardy;<br>Characterisation | 2019; | alpha |  |
| SGAGANSKL     | Hardy;<br>Characterisation | 2019; | alpha |  |
| SRSYNTDKL     | Hardy;<br>Characterisation | 2019; | alpha |  |
| GPTGANNL      | Hardy;<br>Characterisation | 2019; | alpha |  |
| TTDSWGKL      | Hardy;<br>Characterisation | 2019; | alpha |  |
| SGGTGGFKT     | Hardy;<br>Characterisation | 2019; | alpha |  |
| NVVYEKL       | Hardy;<br>Characterisation | 2019; | alpha |  |
| SLAYTSGTYKY   | Hardy;<br>Characterisation | 2019; | alpha |  |
| LNYYGGSQGNL   | Hardy;<br>Characterisation | 2019; | alpha |  |

|              |                            |       |       |  |
|--------------|----------------------------|-------|-------|--|
| EKDSGYSTL    | Hardy;<br>Characterisation | 2019; | alpha |  |
| PHNAGNML     | Hardy;<br>Characterisation | 2019; | alpha |  |
| SGTYKY       | Hardy;<br>Characterisation | 2019; | alpha |  |
| RSGDYTGANSKL | Hardy;<br>Characterisation | 2019; | alpha |  |
| ESGSARQL     | Hardy;<br>Characterisation | 2019; | alpha |  |
| RDLYNFKF     | Hardy;<br>Characterisation | 2019; | alpha |  |
| RTDYLTGTASKL | Hardy;<br>Characterisation | 2019; | alpha |  |
| GRPYTDKL     | Hardy;<br>Characterisation | 2019; | alpha |  |
| SMWGTSYGKL   | Hardy;<br>Characterisation | 2019; | alpha |  |
| SDYNFKF      | Hardy;<br>Characterisation | 2019; | alpha |  |
| SEVPGGGNKL   | Hardy;<br>Characterisation | 2019; | alpha |  |
| RGSAGGTSYGKL | Hardy;<br>Characterisation | 2019; | alpha |  |
| SLSGGYNKL    | Hardy;<br>Characterisation | 2019; | alpha |  |
| ILPXSWGKL    | Hardy;<br>Characterisation | 2019; | alpha |  |
| SEGGTYGNKL   | Hardy;<br>Characterisation | 2019; | alpha |  |
| QGTDSWGKL    | Hardy;<br>Characterisation | 2019; | alpha |  |
| SSAKTSYDKV   | Hardy;<br>Characterisation | 2019; | alpha |  |
| NRGSNYKL     | Hardy;<br>Characterisation | 2019; | alpha |  |
| SWGKL        | Hardy;<br>Characterisation | 2019; | alpha |  |
| QLGGQGAQKL   | Hardy;<br>Characterisation | 2019; | alpha |  |
| QSTGKL       | Hardy;<br>Characterisation | 2019; | alpha |  |

|               |                            |       |       |  |
|---------------|----------------------------|-------|-------|--|
| VTSGSRL       | Hardy;<br>Characterisation | 2019; | alpha |  |
| MEENAGNML     | Hardy;<br>Characterisation | 2019; | alpha |  |
| SAKEYGNKL     | Hardy;<br>Characterisation | 2019; | alpha |  |
| RETSGSRL      | Hardy;<br>Characterisation | 2019; | alpha |  |
| SARWRAL       | Hardy;<br>Characterisation | 2019; | alpha |  |
| IAQPGTYNQGGKL | Hardy;<br>Characterisation | 2019; | alpha |  |
| TGGGNKL       | Hardy;<br>Characterisation | 2019; | alpha |  |
| HPADSYDKV     | Hardy;<br>Characterisation | 2019; | alpha |  |
| MNIGYAL       | Hardy;<br>Characterisation | 2019; | alpha |  |
| GDSSYKL       | Hardy;<br>Characterisation | 2019; | alpha |  |
| EAGSYQL       | Hardy;<br>Characterisation | 2019; | alpha |  |
| SEGSTSGTYKY   | Hardy;<br>Characterisation | 2019; | alpha |  |
| SEGGNNFNKF    | Hardy;<br>Characterisation | 2019; | alpha |  |
| SEASGGKL      | Hardy;<br>Characterisation | 2019; | alpha |  |
| VGPSGSARQL    | Hardy;<br>Characterisation | 2019; | alpha |  |
| IGGGATNKL     | Hardy;<br>Characterisation | 2019; | alpha |  |
| FTSGTYKY      | Hardy;<br>Characterisation | 2019; | alpha |  |
| SAGGSARQL     | Hardy;<br>Characterisation | 2019; | alpha |  |
| SEAAGNKL      | Hardy;<br>Characterisation | 2019; | alpha |  |
| SAGSGGYNKL    | Hardy;<br>Characterisation | 2019; | alpha |  |
| KNTGFQKL      | Hardy;<br>Characterisation | 2019; | alpha |  |

|              |                            |       |       |  |
|--------------|----------------------------|-------|-------|--|
| SDPTGANSKL   | Hardy;<br>Characterisation | 2019; | alpha |  |
| SDPTGTASKL   | Hardy;<br>Characterisation | 2019; | alpha |  |
| SGLRGSSTLGRL | Hardy;<br>Characterisation | 2019; | alpha |  |
| GPSTLAGNKL   | Hardy;<br>Characterisation | 2019; | alpha |  |
| SSLGGGGNKL   | Hardy;<br>Characterisation | 2019; | alpha |  |
| RERGNNDM     | Hardy;<br>Characterisation | 2019; | alpha |  |
| QVSGSGNTGKL  | Hardy;<br>Characterisation | 2019; | alpha |  |
| GDDTGFQKL    | Hardy;<br>Characterisation | 2019; | alpha |  |
| GDETGGYNKL   | Hardy;<br>Characterisation | 2019; | alpha |  |
| GEGDSNYQL    | Hardy;<br>Characterisation | 2019; | alpha |  |
| GPDNQGGKL    | Hardy;<br>Characterisation | 2019; | alpha |  |
| GDGGGGYNKL   | Hardy;<br>Characterisation | 2019; | alpha |  |
| TSGTYKY      | Hardy;<br>Characterisation | 2019; | alpha |  |
| RGVFSGGYNKL  | Hardy;<br>Characterisation | 2019; | alpha |  |
| RDPGGKL      | Hardy;<br>Characterisation | 2019; | alpha |  |
| RGVFSGGYNKL  | Hardy;<br>Characterisation | 2019; | alpha |  |
| LFDSWGKL     | Hardy;<br>Characterisation | 2019; | alpha |  |
| GDDTGFQKL    | Hardy;<br>Characterisation | 2019; | alpha |  |
| GDTGFTGGGNKL | Hardy;<br>Characterisation | 2019; | alpha |  |
| VGYSSASKI    | Hardy;<br>Characterisation | 2019; | alpha |  |
| RPSGYNKL     | Hardy;<br>Characterisation | 2019; | alpha |  |



|              |                            |       |       |  |
|--------------|----------------------------|-------|-------|--|
| NRPTGFQKL    | Hardy;<br>Characterisation | 2019; | alpha |  |
| SGNDYKL      | Hardy;<br>Characterisation | 2019; | alpha |  |
| TGGTSYGKL    | Hardy;<br>Characterisation | 2019; | alpha |  |
| SEGNFNKF     | Hardy;<br>Characterisation | 2019; | alpha |  |
| SEGYNFNKF    | Hardy;<br>Characterisation | 2019; | alpha |  |
| SEATSGTYKY   | Hardy;<br>Characterisation | 2019; | alpha |  |
| TLGNFGNEKL   | Hardy;<br>Characterisation | 2019; | alpha |  |
| NSGFQKL      | Hardy;<br>Characterisation | 2019; | alpha |  |
| SEGLTGGGNKL  | Hardy;<br>Characterisation | 2019; | alpha |  |
| SEAAGNKL     | Hardy;<br>Characterisation | 2019; | alpha |  |
| SKGSSASKI    | Hardy;<br>Characterisation | 2019; | alpha |  |
| TTDSWGKL     | Hardy;<br>Characterisation | 2019; | alpha |  |
| SEAGANSKL    | Hardy;<br>Characterisation | 2019; | alpha |  |
| PNFGNEKL     | Hardy;<br>Characterisation | 2019; | alpha |  |
| QSFAGGTSYGKL | Hardy;<br>Characterisation | 2019; | alpha |  |
| YTGTASKL     | Hardy;<br>Characterisation | 2019; | alpha |  |
| EGTTDSWGKL   | Hardy;<br>Characterisation | 2019; | alpha |  |
| NNNARL       | Hardy;<br>Characterisation | 2019; | alpha |  |
| GSGFQKL      | Hardy;<br>Characterisation | 2019; | alpha |  |
| APTEYGKNKL   | Hardy;<br>Characterisation | 2019; | alpha |  |
| SGLAGGGADGL  | Hardy;<br>Characterisation | 2019; | alpha |  |

|                 |                                  |       |                 |
|-----------------|----------------------------------|-------|-----------------|
| ATYNFNKF        | Hardy; 2019;<br>Characterisation | alpha |                 |
| RINARL          | Hardy; 2019;<br>Characterisation | alpha |                 |
| QGATNKL         | Hardy; 2019;<br>Characterisation | alpha |                 |
| REAYNQGGKL      | Hardy; 2019;<br>Characterisation | alpha |                 |
| MGEYGGATNKL     | Hardy; 2019;<br>Characterisation | alpha |                 |
| NEWEGNKL        | Hardy; 2019;<br>Characterisation | alpha |                 |
| REGGFGQF        | Hardy; 2019;<br>Characterisation | alpha |                 |
| DADSWGKL        | Hardy; 2019;<br>Characterisation | alpha |                 |
| TGGGNKL         | Hardy; 2019;<br>Characterisation | alpha |                 |
| MYSSYKL         | Hardy; 2019;<br>Characterisation | alpha |                 |
| RVAAVTGRRAL     | Hardy; 2019;<br>Characterisation | alpha |                 |
| RDPMNYGGSQGNL   | Hardy; 2019;<br>Characterisation | alpha |                 |
| FTGTASKL        | Hardy; 2019;<br>Characterisation | alpha |                 |
| ALSDHYSSGSARQLT | Gunnarsen; 2017; TCRalpha        | alpha | ASSTAVLAGGPQY   |
| IVTNNNDMR       | Gunnarsen; 2017; TCRalpha        | alpha | ASSIRSTDTQY     |
| AESPGPGKLI      | Gunnarsen; 2017; TCRalpha        | alpha | ASSLRADTQY      |
| AVDPP           | Gunnarsen; 2017; TCRalpha        | alpha | ASSFRSTDQY      |
| AVTRNSGGYQKVT   | Gunnarsen; 2017; TCRalpha        | alpha | ASSIRSTDTQY     |
| APDPSTSGTYKYI   | Gunnarsen; 2017; TCRalpha        | alpha | ASSLRFTDTQY     |
| AEGITGANSKLT    | Gunnarsen; 2017; TCRalpha        | alpha | ASSIRATDTQY     |
| AESGYSTLT       | Gunnarsen; 2017; TCRalpha        | alpha | ASSVRSTDQY      |
| AMKEYGNKLV      | Gunnarsen; 2017; TCRalpha        | alpha | ASSLRSTDQY      |
| ASSTAVLAGGPQY   | Gunnarsen; 2017; TCRalpha        | beta  | ALSDHYSSGSARQLT |
| ASSIRSTDTQY     | Gunnarsen; 2017; TCRalpha        | beta  | IVTNNNDMR       |
| ASSLRADTQY      | Gunnarsen; 2017; TCRalpha        | beta  | AESPGPGKLI      |
| ASSFRSTDQY      | Gunnarsen; 2017; TCRalpha        | beta  | AVDPP           |
| ASSIRSTDTQY     | Gunnarsen; 2017; TCRalpha        | beta  | AVTRNSGGYQKVT   |
| ASSLRFTDTQY     | Gunnarsen; 2017; TCRalpha        | beta  | APDPSTSGTYKYI   |

|                   |                           |       |                  |
|-------------------|---------------------------|-------|------------------|
| ASSIRATDTQY       | Gunnarsen; 2017; TCRalpha | beta  | AEGITGANSKLT     |
| ASSVRSTDTQY       | Gunnarsen; 2017; TCRalpha | beta  | AESGYSTLT        |
| ASSLRSTDTQY       | Gunnarsen; 2017; TCRalpha | beta  | AMKEYGNKLV       |
| CASSQVTLPTETQYF   | cook; 2020; circulating   | beta  |                  |
| CASGQVTLPTETQYF   | cook; 2020; circulating   | beta  |                  |
| CASSSLNTQYF       | cook; 2020; circulating   | beta  |                  |
| CTSSQVTLPTETQYF   | cook; 2020; circulating   | beta  |                  |
| CASSQVTLPTGTQYF   | cook; 2020; circulating   | beta  |                  |
| CASGQVILPTETQYF   | cook; 2020; circulating   | beta  |                  |
| CASSFGVEDEQYF     | cook; 2020; circulating   | beta  |                  |
| CASSSLNTQYF       | cook; 2020; circulating   | beta  |                  |
| CASSIRSTDTQYF     | cook; 2020; circulating   | beta  |                  |
| CASSQVTLPTETQYF   | cook; 2020; circulating   | beta  |                  |
| CASNFGVEDEQYF     | cook; 2020; circulating   | beta  |                  |
| CASSLGVEDEQYF     | cook; 2020; circulating   | beta  |                  |
| CTSSSLNTQYF       | cook; 2020; circulating   | beta  |                  |
| CASSQVTLPTETQYF   | cook; 2020; circulating   | beta  |                  |
| CASSLGGSTDTQYF    | cook; 2020; circulating   | beta  |                  |
| CSASSSGGASYNEQFF  | cook; 2020; circulating   | beta  |                  |
| CASSRTGQGGETQYF   | cook; 2020; circulating   | beta  |                  |
| CASSFGVEDEQYF     | cook; 2020; circulating   | beta  |                  |
| CASSLSFDSPLHF     | cook; 2020; circulating   | beta  |                  |
| CASSRSYGYTF       | cook; 2020; circulating   | beta  |                  |
| CASSLSGADNSPLHF   | cook; 2020; circulating   | beta  |                  |
| CASSVQGITNEKLFF   | cook; 2020; circulating   | beta  |                  |
| CASSQVTLPTETRYF   | cook; 2020; circulating   | beta  |                  |
| CASSQVTLPTETQHf   | cook; 2020; circulating   | beta  |                  |
| CASSWGQGYQPQHF    | cook; 2020; circulating   | beta  |                  |
| CPSFRGDIQYF       | cook; 2020; circulating   | beta  |                  |
| CASSPLSFGGGQETQYF | cook; 2020; circulating   | beta  |                  |
| CAMTLNTDKLIF      | Ting; 2020; molecular     | alpha | CASSLQGGDYGYTF   |
| CAFMKEDGGATNKLIF  | Ting; 2020; molecular     | alpha | CSASPGNTGVAQYF   |
| CIVYLSNFGNEKLTF   | Ting; 2020; molecular     | alpha | CASSLIGGGELFF    |
| CAASAHYGGSQGNLIF  | Ting; 2020; molecular     | alpha | CASGPGTATEAFF    |
| CAYRSQETSGSRLTF   | Ting; 2020; molecular     | alpha | CSASWLGFGGETQYF  |
| CAYTPLETSGSRLTF   | Ting; 2020; molecular     | alpha | CSARAPITGRFYEQYF |
| CAVRPGGSQGNLIF    | Ting; 2020; molecular     | alpha | CASSLTSEETQYF    |
| CAASADLTNRDDKIIF  | Ting; 2020; molecular     | alpha | CASSLTSEETQYF    |
| CAFMKGSYGGSQGNLIF | Ting; 2020; molecular     | alpha | CASSRTANYEQYF    |
| FLLGITSGETYKYIF   | Ting; 2020; molecular     | alpha | CASSRTANYEQYF    |
| CIVRVAEGAQKLVF    | Ting; 2020; molecular     | alpha | CSATKETQYF       |

|                   |                       |       |                   |
|-------------------|-----------------------|-------|-------------------|
| CIVRVAEGAQKLVF    | Ting; 2020; molecular | alpha | CSATKETQYF        |
| CAVHTGARLMF       | Ting; 2020; molecular | alpha | CASSHGASTDTQYF    |
| CIVRVAEGAQKLVF    | Ting; 2020; molecular | alpha | CSATKETQYF        |
| CALVRDYGQNFVF     | Ting; 2020; molecular | alpha | CASSTSGGGARSYEQYF |
| CAWTGGGGFKTIF     | Ting; 2020; molecular | alpha | CASRKPGGDYEQYF    |
| CAVIGTSGSRLTF     | Ting; 2020; molecular | alpha | CASSSGAATDTQYF    |
| CIVRPAQGAQKLVF    | Ting; 2020; molecular | alpha | CSVSSGGEENGNYTF   |
| CASPQGGSEKLVF     | Ting; 2020; molecular | alpha | CASSSGGWGGGTEAFF  |
| CAGRDDFNKFYF      | Ting; 2020; molecular | alpha | CASSSGGWGGGTEAFF  |
| CALGLNNNAGNMLTF   | Ting; 2020; molecular | alpha | CAISPRQAETQYF     |
| CAASGYSTLTF       | Ting; 2020; molecular | alpha | CASTHGAGSDTQYF    |
| CAVSGNTGFQKLVF    | Ting; 2020; molecular | alpha | CASTSRGGNSNQPHF   |
| CALGATVMDSSYKLI   | Ting; 2020; molecular | alpha | CASTSRGGNSNQPHF   |
| CASSLQGGDYGTYF    | Ting; 2020; molecular | beta  | CAMTLNTDKLIF      |
| CSASPGNTGVAQYF    | Ting; 2020; molecular | beta  | CAFMKEDGGATNKLIF  |
| CASSLIGGGELFF     | Ting; 2020; molecular | beta  | CIVYLSNFGNEKLTF   |
| CASGPGTATEAFF     | Ting; 2020; molecular | beta  | CAASAHYGGSQGNLIF  |
| CSASWLGFGETQYF    | Ting; 2020; molecular | beta  | CAYRSQETSGSRLTF   |
| CSARAPITGRFYEQYF  | Ting; 2020; molecular | beta  | CAYTPLETSGSRLTF   |
| CASSLTSEETQYF     | Ting; 2020; molecular | beta  | CAVRPGGSQGNLIF    |
| CASSLTSEETQYF     | Ting; 2020; molecular | beta  | CAASADLTNRDDKIIF  |
| CASSRTANYEQYF     | Ting; 2020; molecular | beta  | CAFMKGSYGGSQGNLIF |
| CASSRTANYEQYF     | Ting; 2020; molecular | beta  | FLLGITSGETYKYIF   |
| CSATKETQYF        | Ting; 2020; molecular | beta  | CIVRVAEGAQKLVF    |
| CSATKETQYF        | Ting; 2020; molecular | beta  | CIVRVAEGAQKLVF    |
| CASSHGASTDTQYF    | Ting; 2020; molecular | beta  | CAVHTGARLMF       |
| CSATKETQYF        | Ting; 2020; molecular | beta  | CIVRVAEGAQKLVF    |
| CASSTSGGGARSYEQYF | Ting; 2020; molecular | beta  | CALVRDYGQNFVF     |
| CASRKPGGDYEQYF    | Ting; 2020; molecular | beta  | CAWTGGGGFKTIF     |
| CASSSGAATDTQYF    | Ting; 2020; molecular | beta  | CAVIGTSGSRLTF     |
| CSVSSGGEENGNYTF   | Ting; 2020; molecular | beta  | CIVRPAQGAQKLVF    |
| CASSSGGWGGGTEAFF  | Ting; 2020; molecular | beta  | CASPQGGSEKLVF     |
| CASSSGGWGGGTEAFF  | Ting; 2020; molecular | beta  | CAGRDDFNKFYF      |
| CAISPRQAETQYF     | Ting; 2020; molecular | beta  | CALGLNNNAGNMLTF   |
| CASTHGAGSDTQYF    | Ting; 2020; molecular | beta  | CAASGYSTLTF       |
| CASTSRGGNSNQPHF   | Ting; 2020; molecular | beta  | CAVSGNTGFQKLVF    |
| CASTSRGGNSNQPHF   | Ting; 2020; molecular | beta  | CALGATVMDSSYKLI   |
| IVTNNNDMR         | qiao; 2013; biased    | alpha | IRSTDT            |
| IAWANDMR          | qiao; 2013; biased    | alpha | LRSTD             |
| IGFNDKLS          | qiao; 2013; biased    | alpha | LRSTD             |
| TDSGGGADGLT       | qiao; 2013; biased    | alpha | LRFTDT            |

|               |                    |       |              |
|---------------|--------------------|-------|--------------|
| IVFGGYQKVT    | qiao; 2013; biased | alpha | LRATDT       |
| IVTGGADGLT    | qiao; 2013; biased | alpha | IRTTDT       |
| IAPYGGATNKLI  | qiao; 2013; biased | alpha | IRWTD        |
| IDFGGSQGNLI   | qiao; 2013; biased | alpha | IRATDT       |
| IVTNGQNFV     | qiao; 2013; biased | alpha | LRTSDT       |
| ISLNGAQKLV    | qiao; 2013; biased | alpha | RRSTD        |
| IANYGGSQGNLI  | qiao; 2013; biased | alpha | MRFTDT       |
| IVNGGANNLF    | qiao; 2013; biased | alpha | IRHTDT       |
| IVYGGGSQGNLI  | qiao; 2013; biased | alpha | FRNTDT       |
| IVFNDYKLS     | qiao; 2013; biased | alpha | FRSTD        |
| IAYGKLT       | qiao; 2013; biased | alpha | VRFTDT       |
| IALNARLM      | qiao; 2013; biased | alpha | LRATDT       |
| IVYNDYKLS     | qiao; 2013; biased | alpha | LRTTDT       |
| IVHQGKLI      | qiao; 2013; biased | alpha | IRFTDT       |
| IVMGGADGLT    | qiao; 2013; biased | alpha | FRSTD        |
| IVYNDYKLS     | qiao; 2013; biased | alpha | LRTTDT       |
| IAPFGNDR      | qiao; 2013; biased | alpha | IRETDT       |
| IAFNDYKLS     | qiao; 2013; biased | alpha | LRSTD        |
| IAYNDYKLS     | qiao; 2013; biased | alpha | FRSTD        |
| IGDYGGGSQGNLI | qiao; 2013; biased | alpha | LRFTDT       |
| IVYNNARLM     | qiao; 2013; biased | alpha | VRHTDT       |
| IGNYGGGSQGNLI | qiao; 2013; biased | alpha | LRYTDT       |
| IVFGGSQGNLI   | qiao; 2013; biased | alpha | IRATDT       |
| IVLSQNFV      | qiao; 2013; biased | alpha | LRYTDT       |
| IAPDNAGNMLTF  | qiao; 2013; biased | alpha | IRFTDT       |
| IAWGGYQNFV    | qiao; 2013; biased | alpha | IRATDT       |
| IRSTDT        | qiao; 2013; biased | beta  | IVTNNNDMR    |
| LRSTD         | qiao; 2013; biased | beta  | IAWANDMR     |
| LRSTD         | qiao; 2013; biased | beta  | IGFNDKLS     |
| LRFTDT        | qiao; 2013; biased | beta  | TDSGGGADGLT  |
| LRATDT        | qiao; 2013; biased | beta  | IVFGGYQKVT   |
| IRTTDT        | qiao; 2013; biased | beta  | IVTGGADGLT   |
| IRWTD         | qiao; 2013; biased | beta  | IAPYGGATNKLI |
| IRATDT        | qiao; 2013; biased | beta  | IDFGGSQGNLI  |
| LRTSD         | qiao; 2013; biased | beta  | IVTNGQNFV    |
| RRSTD         | qiao; 2013; biased | beta  | ISLNGAQKLV   |
| MRFTDT        | qiao; 2013; biased | beta  | IANYGGSQGNLI |
| IRHTDT        | qiao; 2013; biased | beta  | IVNGGANNLF   |
| FRNTDT        | qiao; 2013; biased | beta  | IVYGGGSQGNLI |
| FRSTD         | qiao; 2013; biased | beta  | IVFNDYKLS    |
| VRFTDT        | qiao; 2013; biased | beta  | IAYGKLT      |

|                  |                               |       |                  |
|------------------|-------------------------------|-------|------------------|
| LRATDT           | qiao; 2013; biased            | beta  | IALNARLM         |
| LRTTDT           | qiao; 2013; biased            | beta  | IVYNDYKLS        |
| IRFTDT           | qiao; 2013; biased            | beta  | IVHQGKLI         |
| FRSTDT           | qiao; 2013; biased            | beta  | IVMGGADGLT       |
| LRTTDT           | qiao; 2013; biased            | beta  | IVYNDYKLS        |
| IRETDT           | qiao; 2013; biased            | beta  | IAPFGNDRM        |
| LRSTDT           | qiao; 2013; biased            | beta  | IAFNDYKLS        |
| FRSTDT           | qiao; 2013; biased            | beta  | IAYNDYKLS        |
| LRFTDT           | qiao; 2013; biased            | beta  | IGDYGGSQGNLI     |
| VRHTDT           | qiao; 2013; biased            | beta  | IVYNNARLM        |
| LRYTDT           | qiao; 2013; biased            | beta  | IGNYGGSQGNLI     |
| IRATDT           | qiao; 2013; biased            | beta  | IVFGGSQGNLI      |
| LRYTDT           | qiao; 2013; biased            | beta  | IVLSQNFV         |
| IRFTDT           | qiao; 2013; biased            | beta  | IAPDNAGNMLTF     |
| IRATDT           | qiao; 2013; biased            | beta  | IAWGGYGQNFV      |
| ASSIRSTDTQY      | Qiao; 2011; posttranslational | beta  |                  |
| ASSLRYTDTQY      | Qiao; 2011; posttranslational | beta  |                  |
| ASSLRSTDTQY      | Qiao; 2011; posttranslational | beta  |                  |
| ASSFRSTDTQY      | Qiao; 2011; posttranslational | beta  |                  |
| ASSLRFTDTQY      | Qiao; 2011; posttranslational | beta  |                  |
| ASSIRATDTQY      | Qiao; 2011; posttranslational | beta  |                  |
| CAASEGDSGTQYIF   | Dahal-Koirala; 2019; discrim  | alpha | CASSINALVGEQFF   |
| CAVKFASGTQYIF    | Dahal-Koirala; 2019; discrim  | alpha | CASSPAFSTDTQYF   |
| CAMREGWQAGNTLIF  | Dahal-Koirala; 2019; discrim  | alpha | CASSLDGLTNTTEAFF |
| CAVVDASSKLIF     | Dahal-Koirala; 2019; discrim  | alpha | CSATLGGDYGYTF    |
| CLVGGYNNNDMRF    | Dahal-Koirala; 2019; discrim  | alpha | CSAQLAGGGGDTQYF  |
| CAESRYSGYSTLTF   | Dahal-Koirala; 2019; discrim  | alpha | CSAFPGGDTEAFF    |
| CALSEYGNKLVF     | Dahal-Koirala; 2019; discrim  | alpha | CASSYVGGDTDTQYF  |
| CASSINALVGEQFF   | Dahal-Koirala; 2019; discrim  | beta  | CAASEGDSGTQYIF   |
| CASSPAFSTDTQYF   | Dahal-Koirala; 2019; discrim  | beta  | CAVKFASGTQYIF    |
| CASSLDGLTNTTEAFF | Dahal-Koirala; 2019; discrim  | beta  | CAMREGWQAGNTLIF  |
| CSATLGGDYGYTF    | Dahal-Koirala; 2019; discrim  | beta  | CAVVDASSKLIF     |
| CSAQLAGGGGDTQYF  | Dahal-Koirala; 2019; discrim  | beta  | CLVGGYNNNDMRF    |
| CSAFPGGDTEAFF    | Dahal-Koirala; 2019; discrim  | beta  | CAESRYSGYSTLTF   |
| CASSYVGGDTDTQYF  | Dahal-Koirala; 2019; discrim  | beta  | CALSEYGNKLVF     |
| SLRTSGSHEQ       | Hardy; 2015; consistency      | beta  |                  |
| STRTYGGNIQ       | Hardy; 2015; consistency      | beta  |                  |
| SLRWTDQ          | Hardy; 2015; consistency      | beta  |                  |
| SLRSSGSHEQ       | Hardy; 2015; consistency      | beta  |                  |
| SIRSTDTQ         | Hardy; 2015; consistency      | beta  |                  |
| SIRLADEGEQ       | Hardy; 2015; consistency      | beta  |                  |

|                     |                          |       |                  |
|---------------------|--------------------------|-------|------------------|
| SLRFTDTQ            | Hardy; 2015; consistency | beta  |                  |
| SLRAAGENIQ          | Hardy; 2015; consistency | beta  |                  |
| SLRTSGGHEQ          | Hardy; 2015; consistency | beta  |                  |
| SLIGAETQ            | Hardy; 2015; consistency | beta  |                  |
| SRRSTDTQ            | Hardy; 2015; consistency | beta  |                  |
| SVRALGADTQ          | Hardy; 2015; consistency | beta  |                  |
| IDPRGPGYGY          | Hardy; 2015; consistency | beta  |                  |
| SFRVLAQETQ          | Hardy; 2015; consistency | beta  |                  |
| SIRATDTQ            | Hardy; 2015; consistency | beta  |                  |
| SLRDYETQ            | Hardy; 2015; consistency | beta  |                  |
| SPRTSGGLFTYEQ       | Hardy; 2015; consistency | beta  |                  |
| SLRSTDTQ            | Hardy; 2015; consistency | beta  |                  |
| SLAPLTSTDTQ         | Hardy; 2015; consistency | beta  |                  |
| SLVARDHEQ           | Hardy; 2015; consistency | beta  |                  |
| SFRFTDTQ            | Hardy; 2015; consistency | beta  |                  |
| SVRTSGSHEQ          | Hardy; 2015; consistency | beta  |                  |
| STRWGDEGEQ          | Hardy; 2015; consistency | beta  |                  |
| SLRAGGGTQ           | Hardy; 2015; consistency | beta  |                  |
| SIRSTDTQ            | Hardy; 2015; consistency | beta  |                  |
| SLRYTDTQ            | Hardy; 2015; consistency | beta  |                  |
| SLRTGGENEQ          | Hardy; 2015; consistency | beta  |                  |
| SIRAGDGNTQ          | Hardy; 2015; consistency | beta  |                  |
| SFRTTDTQ            | Hardy; 2015; consistency | beta  |                  |
| SLRSTDTQ            | Hardy; 2015; consistency | beta  |                  |
| SLAASEPGY           | Hardy; 2015; consistency | beta  |                  |
| SLKWDYEQ            | Hardy; 2015; consistency | beta  |                  |
| CAYRSGYMEYGNKLV     | Peterson; 2014; T-cell   | alpha | CSVSGGPSTDTQYF   |
| CLVGDNNDYKLSF       | Peterson; 2014; T-cell   | alpha | CSVGQTDSPHF      |
| CAVELGDSWGKFQF      | Peterson; 2014; T-cell   | alpha | CSAGQGGTGELFF    |
| CAAPGGATNKLIF       | Peterson; 2014; T-cell   | alpha | CSVAALAGFQETQYF  |
| CAVGWEDGTASKLTF     | Peterson; 2014; T-cell   | alpha | CSASRWRSTDTQYF   |
| CLVGDDGSFSGGYNKLIF  | Peterson; 2014; T-cell   | alpha | CSAGVGGQETQYF    |
| CAVQADGNTGKLIF      | Peterson; 2014; T-cell   | alpha | CSAYRTWDQETQYF   |
| CAFIGGSNYKLTF       | Peterson; 2014; T-cell   | alpha | CSAREPDNTGELFF   |
| ND (not determined) | Peterson; 2014; T-cell   | alpha | CSARGYGLANPYEQY  |
| CAGPYNTDKLIF        | Peterson; 2014; T-cell   | alpha | CASSLASAGGTDQYF  |
| CAASANYGGATNKLIF    | Peterson; 2014; T-cell   | alpha | CASSLNWDTEAFF    |
| CAVTLGGGSEKLVF      | Peterson; 2014; T-cell   | alpha | CASSFSPAGSEAFF   |
| CAVGAGSANYQLIW      | Peterson; 2014; T-cell   | alpha | CASSLEGQGASEQFF  |
| CLVAGAGGYNKLIF      | Peterson; 2014; T-cell   | alpha | CASSQGLAGVQETQYF |
| CAGPSGATNKLIF       | Peterson; 2014; T-cell   | alpha | CASSPTALGTDTQYF  |

|                    |                        |       |                     |
|--------------------|------------------------|-------|---------------------|
| CIVLGGADGLTF       | Peterson; 2014; T-cell | alpha | CASSFRFTDTQYF       |
| CIVWGGATNKLIF      | Peterson; 2014; T-cell | alpha | CASSVRSTDTQYF       |
| CIAFQGAQKLVF       | Peterson; 2014; T-cell | alpha | CASSFRALAADTQYF     |
| CLVGEAAGNKLTF      | Peterson; 2014; T-cell | alpha | CASSIRTSGDHEQYF     |
| CAVGRGGSQGNLIF     | Peterson; 2014; T-cell | alpha | CASSQYQSLVRGNNEQFF  |
| CAMREGRGAGSYQLTF   | Peterson; 2014; T-cell | alpha | CASSFPQVTDQYF       |
| CAMSVLSGTYKYIF     | Peterson; 2014; T-cell | alpha | CASSHVDRGGETQYF     |
| CSVSGGPSTDTQYF     | Peterson; 2014; T-cell | beta  | CAYRSGYMEYGNKLV     |
| CSVGQTDSPH         | Peterson; 2014; T-cell | beta  | CLVGDNDYKLSF        |
| CSAGQGGTGELFF      | Peterson; 2014; T-cell | beta  | CAVELGDSWGKFQF      |
| CSVAALAGFQETQYF    | Peterson; 2014; T-cell | beta  | CAAPGGATNKLIF       |
| CSASRWRSTDTQYF     | Peterson; 2014; T-cell | beta  | CAVGWEDGTASKLTF     |
| CSAGVGGQETQYF      | Peterson; 2014; T-cell | beta  | CLVGDGGSFSGGYNKLIF  |
| CSAYRTWDQETQYF     | Peterson; 2014; T-cell | beta  | CAVQADGNTGKLIF      |
| CSAREPDNTGELFF     | Peterson; 2014; T-cell | beta  | CAFIGGSNYKLTF       |
| CSARGYGLANPYEQY    | Peterson; 2014; T-cell | beta  | ND (not determined) |
| CASSLASAGGTDQYF    | Peterson; 2014; T-cell | beta  | CAGPYNTDKLIF        |
| CASSLNWDTEAFF      | Peterson; 2014; T-cell | beta  | CAASANYGGATNKLIF    |
| CASSFPAGSEAFF      | Peterson; 2014; T-cell | beta  | CAVTLGGGSEKLVF      |
| CASSLEGQGASEQFF    | Peterson; 2014; T-cell | beta  | CAVGAGSANYQLIW      |
| CASSQGLAGVQETQYF   | Peterson; 2014; T-cell | beta  | CLVAGAGGYNKLIF      |
| CASSPTALGTDQYF     | Peterson; 2014; T-cell | beta  | CAGPSGATNKLIF       |
| CASSFRFTDTQYF      | Peterson; 2014; T-cell | beta  | CIVLGGADGLTF        |
| CASSVRSTDTQYF      | Peterson; 2014; T-cell | beta  | CIVWGGATNKLIF       |
| CASSFRALAADTQYF    | Peterson; 2014; T-cell | beta  | CIAFQGAQKLVF        |
| CASSIRTSGDHEQYF    | Peterson; 2014; T-cell | beta  | CLVGEAAGNKLTF       |
| CASSQYQSLVRGNNEQFF | Peterson; 2014; T-cell | beta  | CAVGRGGSQGNLIF      |
| CASSFPQVTDQYF      | Peterson; 2014; T-cell | beta  | CAMREGRGAGSYQLTF    |
| CASSHVDRGGETQYF    | Peterson; 2014; T-cell | beta  | CAMSVLSGTYKYIF      |
| CASSPGTDTQYF       | Han; 2013; dietary     | beta  |                     |
| CASSFGGELFF        | Han; 2013; dietary     | beta  |                     |
| CASAGNYEKLFF       | Han; 2013; dietary     | beta  |                     |
| CASSAGHPEQFF       | Han; 2013; dietary     | beta  |                     |
| CASSLINTEAFF       | Han; 2013; dietary     | beta  |                     |
| CASSNLRQGAAGNTIYF  | Han; 2013; dietary     | beta  |                     |
| CASSQEEQGAFYEQFF   | Han; 2013; dietary     | beta  |                     |
| CASTEGQAEAFF       | Han; 2013; dietary     | beta  |                     |
| CATSGTSGYNEQFF     | Han; 2013; dietary     | beta  |                     |
| CSVDGNYLTDTQYF     | Han; 2013; dietary     | beta  |                     |
| CASRIQGECSPLHF     | Han; 2013; dietary     | beta  |                     |
| CASSPGTNTQYF       | Han; 2013; dietary     | beta  |                     |



|                  |                    |      |  |
|------------------|--------------------|------|--|
| CASSQDLGDYGYTF   | Han; 2013; dietary | beta |  |
| CSVEMNTEAFF      | Han; 2013; dietary | beta |  |
| CAISDPPLATEAFF   | Han; 2013; dietary | beta |  |
| CAISSGQVPEQFF    | Han; 2013; dietary | beta |  |
| CASEMDANTGELFF   | Han; 2013; dietary | beta |  |
| CASKLGGATEAFF    | Han; 2013; dietary | beta |  |
| CASNQGQGVETQYF   | Han; 2013; dietary | beta |  |
| CASSEGTYEQYF     | Han; 2013; dietary | beta |  |
| CASSFGTDTQYF     | Han; 2013; dietary | beta |  |
| CASSFGTSDQFF     | Han; 2013; dietary | beta |  |
| CASSFLGTYEQYF    | Han; 2013; dietary | beta |  |
| CASSFPNPTFEAFF   | Han; 2013; dietary | beta |  |
| CASSFRGQGNEQYF   | Han; 2013; dietary | beta |  |
| CASSFTGSSYEQYF   | Han; 2013; dietary | beta |  |
| CASSGGTVYGYTF    | Han; 2013; dietary | beta |  |
| CASSGSGGVGTGELFF | Han; 2013; dietary | beta |  |
| CASSLASVGSTE AFF | Han; 2013; dietary | beta |  |
| CASSLGTGGYNEQFF  | Han; 2013; dietary | beta |  |
| CASSLLGLTGELFF   | Han; 2013; dietary | beta |  |
| CASSLNLGQNTEAFF  | Han; 2013; dietary | beta |  |
| CASSLPLGQGNQPQHF | Han; 2013; dietary | beta |  |
| CASSLPPRGGGYEQYF | Han; 2013; dietary | beta |  |
| CASSPEDPYTDTQYF  | Han; 2013; dietary | beta |  |
| CASSPEREVYNEQFF  | Han; 2013; dietary | beta |  |
| CASSPFGDYYEQYF   | Han; 2013; dietary | beta |  |
| CASSPGTNIQYF     | Han; 2013; dietary | beta |  |
| CASSPGTVVYGYTF   | Han; 2013; dietary | beta |  |
| CASSPGTYEQYF     | Han; 2013; dietary | beta |  |
| CASSPGVYEQYF     | Han; 2013; dietary | beta |  |
| CASSPSNTGELFF    | Han; 2013; dietary | beta |  |
| CASSQAGALWDYGYTF | Han; 2013; dietary | beta |  |
| CASSQGIRSEYEQYF  | Han; 2013; dietary | beta |  |
| CASSQLPVNSPLHF   | Han; 2013; dietary | beta |  |
| CASSSGLATDTQYF   | Han; 2013; dietary | beta |  |
| CASSTGHMEDTQYF   | Han; 2013; dietary | beta |  |
| CASSTGVSGANVLTF  | Han; 2013; dietary | beta |  |
| CASSVEGGMGEKLFF  | Han; 2013; dietary | beta |  |
| CASSVGAGVNSYEQYF | Han; 2013; dietary | beta |  |
| CASSVRAGTGTYEQYF | Han; 2013; dietary | beta |  |
| CASSVSTGSYEQYF   | Han; 2013; dietary | beta |  |
| CASSWDRATNEKLFF  | Han; 2013; dietary | beta |  |

|                    |                    |      |  |
|--------------------|--------------------|------|--|
| CASSYAPTGNYGTYF    | Han; 2013; dietary | beta |  |
| CASSYKRPGELFF      | Han; 2013; dietary | beta |  |
| CASSYSMASGGAQETQYF | Han; 2013; dietary | beta |  |
| CASSYTAGSNQPQHF    | Han; 2013; dietary | beta |  |
| CASSYWEEGGGAFF     | Han; 2013; dietary | beta |  |
| CASSYWGPMNTEAFF    | Han; 2013; dietary | beta |  |
| CAWSVKTLRRADTQYF   | Han; 2013; dietary | beta |  |
| CSAAGHFYEQYF       | Han; 2013; dietary | beta |  |
| CSAMTQEDYAFF       | Han; 2013; dietary | beta |  |
| CSARDFSLRTGELFF    | Han; 2013; dietary | beta |  |
| CSARDMFGGHVSGNTIYF | Han; 2013; dietary | beta |  |
| CSVDGLAGITDTQYF    | Han; 2013; dietary | beta |  |
| CASSPGTDTQYF       | Han; 2013; dietary | beta |  |
| CSVEMNTEAFF        | Han; 2013; dietary | beta |  |
| CASSLLAGGAEQFF     | Han; 2013; dietary | beta |  |
| CASSNLRQGAAGNTIYF  | Han; 2013; dietary | beta |  |
| CASSQEEQGAFYEQFF   | Han; 2013; dietary | beta |  |
| CASSSSDRATDTQYF    | Han; 2013; dietary | beta |  |
| CAWSVKTLRRADTQYF   | Han; 2013; dietary | beta |  |
| CASSAGHPEQFF       | Han; 2013; dietary | beta |  |
| CASSLASVGSTE AFF   | Han; 2013; dietary | beta |  |
| CASSYRQAGYEQYF     | Han; 2013; dietary | beta |  |
| CASTEGQAE AFF      | Han; 2013; dietary | beta |  |
| CASSLPTAVTE AFF    | Han; 2013; dietary | beta |  |
| CASEMDANTGELFF     | Han; 2013; dietary | beta |  |
| CASRIQEGGSPLHF     | Han; 2013; dietary | beta |  |
| CASSDRGFPSYEQYF    | Han; 2013; dietary | beta |  |
| CASSFGGELFF        | Han; 2013; dietary | beta |  |
| CASSFGNQPQHF       | Han; 2013; dietary | beta |  |
| CASSFSLAGWSYNEQFF  | Han; 2013; dietary | beta |  |
| CASSFSNGENTDTQYF   | Han; 2013; dietary | beta |  |
| CASSHLGGGNTIYF     | Han; 2013; dietary | beta |  |
| CASSLAGDSYNEQFF    | Han; 2013; dietary | beta |  |
| CASSLGQGTPTDTQYF   | Han; 2013; dietary | beta |  |
| CASSLINTE AFF      | Han; 2013; dietary | beta |  |
| CASSLSLAGDTGELFF   | Han; 2013; dietary | beta |  |
| CASSLTRQGGEGSPLHF  | Han; 2013; dietary | beta |  |
| CASSLVADSYNEQFF    | Han; 2013; dietary | beta |  |
| CASSLVGPGDTQYF     | Han; 2013; dietary | beta |  |
| CASSPFSGDYEQYF     | Han; 2013; dietary | beta |  |
| CASSPGTAL AFF      | Han; 2013; dietary | beta |  |

|                    |                    |      |  |
|--------------------|--------------------|------|--|
| CASSQDGGARQHF      | Han; 2013; dietary | beta |  |
| CASSQDSGGARNNEQFF  | Han; 2013; dietary | beta |  |
| CASSQDWALGWGYGYTF  | Han; 2013; dietary | beta |  |
| CASSQLTQNTAEFF     | Han; 2013; dietary | beta |  |
| CASSQPFVGSNGTIYF   | Han; 2013; dietary | beta |  |
| CASSRDWGETQYF      | Han; 2013; dietary | beta |  |
| CASSRGLAGESTDTQYF  | Han; 2013; dietary | beta |  |
| CASSRPASYEQYF      | Han; 2013; dietary | beta |  |
| CASSSGADLYGYTF     | Han; 2013; dietary | beta |  |
| CASSSGLSYNEQFF     | Han; 2013; dietary | beta |  |
| CASSSGTLETQYF      | Han; 2013; dietary | beta |  |
| CASSSSSGSTYEQYF    | Han; 2013; dietary | beta |  |
| CASSSWTGTNTEAFF    | Han; 2013; dietary | beta |  |
| CASSWLAGGPAGELFF   | Han; 2013; dietary | beta |  |
| CASSYATGTPSSYNEQFF | Han; 2013; dietary | beta |  |
| CASSYGSDSYNEQFF    | Han; 2013; dietary | beta |  |
| CSARVSGSLYEQYF     | Han; 2013; dietary | beta |  |
| CSVDGNYLTDQYF      | Han; 2013; dietary | beta |  |
| CSVEMSGGDYEQYF     | Han; 2013; dietary | beta |  |
| CASSYDVRSNGYEQYF   | Han; 2013; dietary | beta |  |
| CASSPSDPSDTQYF     | Han; 2013; dietary | beta |  |
| CASSPGTGSGDEQFF    | Han; 2013; dietary | beta |  |
| CASSVGGVQPQHF      | Han; 2013; dietary | beta |  |
| CASNLAGGSNEQFF     | Han; 2013; dietary | beta |  |
| CASSFGQVTEYEQYF    | Han; 2013; dietary | beta |  |
| CASSLGAETQYF       | Han; 2013; dietary | beta |  |
| CASSQDWGDYGYTF     | Han; 2013; dietary | beta |  |
| CASSSEQDRGSENTIYF  | Han; 2013; dietary | beta |  |
| CASSWSGYEQYF       | Han; 2013; dietary | beta |  |
| CASSWTGNEQFF       | Han; 2013; dietary | beta |  |
| CAIRATGLAGVDTGELFF | Han; 2013; dietary | beta |  |
| CAISEQEYGTAEFF     | Han; 2013; dietary | beta |  |
| CAISFGTGEAPRGYTF   | Han; 2013; dietary | beta |  |
| CAISPDRVTFEVFF     | Han; 2013; dietary | beta |  |
| CALWGGAYEQYF       | Han; 2013; dietary | beta |  |
| CASCFTSLGTGELFF    | Han; 2013; dietary | beta |  |
| CASGSSEQFF         | Han; 2013; dietary | beta |  |
| CASGTSQAYEQYF      | Han; 2013; dietary | beta |  |
| CASIQGHEQYF        | Han; 2013; dietary | beta |  |
| CASNAGAGFGYEQYF    | Han; 2013; dietary | beta |  |
| CASRGTVRGGYEQYF    | Han; 2013; dietary | beta |  |

|                      |                    |      |  |
|----------------------|--------------------|------|--|
| CASRLGTAPAFF         | Han; 2013; dietary | beta |  |
| CASRRTAATNEKLFF      | Han; 2013; dietary | beta |  |
| CASSARNSNQPHF        | Han; 2013; dietary | beta |  |
| CASSARTGAYGYTF       | Han; 2013; dietary | beta |  |
| CASSDEAGYGYTF        | Han; 2013; dietary | beta |  |
| CASSDLPSGAPQETQYF    | Han; 2013; dietary | beta |  |
| CASSETASSTDQYF       | Han; 2013; dietary | beta |  |
| CASSFAETQYF          | Han; 2013; dietary | beta |  |
| CASSFDPRGEKLFF       | Han; 2013; dietary | beta |  |
| CASSFGTGSSETQYF      | Han; 2013; dietary | beta |  |
| CASSFGVYNEQFF        | Han; 2013; dietary | beta |  |
| CASSFPPSGDSTDQYF     | Han; 2013; dietary | beta |  |
| CASSFSGSDTGELFF      | Han; 2013; dietary | beta |  |
| CASSFTGTPTYEQYF      | Han; 2013; dietary | beta |  |
| CASSHGQGNQPHF        | Han; 2013; dietary | beta |  |
| CASSHPTRSYNEQFF      | Han; 2013; dietary | beta |  |
| CASSHRRGIPPPPLYNEQFF | Han; 2013; dietary | beta |  |
| CASSIAARAGELFF       | Han; 2013; dietary | beta |  |
| CASSIGVLNTEAFF       | Han; 2013; dietary | beta |  |
| CASSKLDGYTF          | Han; 2013; dietary | beta |  |
| CASSKPPETQYF         | Han; 2013; dietary | beta |  |
| CASSLAGGIAKNIQYF     | Han; 2013; dietary | beta |  |
| CASSLAPWMDYGYTF      | Han; 2013; dietary | beta |  |
| CASSLFTGGTYEQYF      | Han; 2013; dietary | beta |  |
| CASSLGGLGFEQFF       | Han; 2013; dietary | beta |  |
| CASSLGGSNQPHF        | Han; 2013; dietary | beta |  |
| CASSLGLGTGELFF       | Han; 2013; dietary | beta |  |
| CASSLGRVEAFF         | Han; 2013; dietary | beta |  |
| CASSLGTSQETQYF       | Han; 2013; dietary | beta |  |
| CASSLLRLAGETTYNEQFF  | Han; 2013; dietary | beta |  |
| CASSLPGTGTSPLHF      | Han; 2013; dietary | beta |  |
| CASSLRGYTDTQYF       | Han; 2013; dietary | beta |  |
| CASSLRQGGYEQYF       | Han; 2013; dietary | beta |  |
| CASSLSADRDGGYTF      | Han; 2013; dietary | beta |  |
| CASSLSQGGHNEQFF      | Han; 2013; dietary | beta |  |
| CASSLVPPGGFSYEQYF    | Han; 2013; dietary | beta |  |
| CASSMGQGNSGETQYF     | Han; 2013; dietary | beta |  |
| CASSPGGAGYTF         | Han; 2013; dietary | beta |  |
| CASSPGGWSYEQYF       | Han; 2013; dietary | beta |  |
| CASSPGQGNN SPLHF     | Han; 2013; dietary | beta |  |
| CASSPISRDRNTGELFF    | Han; 2013; dietary | beta |  |

|                     |                    |      |  |
|---------------------|--------------------|------|--|
| CASSPLGSGTEAFF      | Han; 2013; dietary | beta |  |
| CASSPNPNTGELFF      | Han; 2013; dietary | beta |  |
| CASSPPDRGYDNEQFF    | Han; 2013; dietary | beta |  |
| CASSPPLTEAFF        | Han; 2013; dietary | beta |  |
| CASSPRLAGAKDTQYF    | Han; 2013; dietary | beta |  |
| CASSPRSAGGPYEQYF    | Han; 2013; dietary | beta |  |
| CASSPTSGRTTSYEQYF   | Han; 2013; dietary | beta |  |
| CASSQDGGTYNEQFF     | Han; 2013; dietary | beta |  |
| CASSQGDRDYEQFF      | Han; 2013; dietary | beta |  |
| CASSSGTAQSEKLFF     | Han; 2013; dietary | beta |  |
| CASSSLGTEVYEQYF     | Han; 2013; dietary | beta |  |
| CASSSPGDSYEQYF      | Han; 2013; dietary | beta |  |
| CASSSSGRAQTDQYF     | Han; 2013; dietary | beta |  |
| CASSSTGGISWNTEAFF   | Han; 2013; dietary | beta |  |
| CASSSTGPPFNYGYTF    | Han; 2013; dietary | beta |  |
| CASSSTPGGLWYGYTF    | Han; 2013; dietary | beta |  |
| CASSSTYEQYF         | Han; 2013; dietary | beta |  |
| CASSTRTHTYSNQPQHF   | Han; 2013; dietary | beta |  |
| CASSVKRLNTEAFF      | Han; 2013; dietary | beta |  |
| CASSYGQSFEQYF       | Han; 2013; dietary | beta |  |
| CASSYKQGIHEQYF      | Han; 2013; dietary | beta |  |
| CASSYSQGNYGTYF      | Han; 2013; dietary | beta |  |
| CASSYTPGGNTDTQYF    | Han; 2013; dietary | beta |  |
| CASSYWAGDYGTYF      | Han; 2013; dietary | beta |  |
| CASTAGFNQPQHF       | Han; 2013; dietary | beta |  |
| CASTDVTSGQETQYF     | Han; 2013; dietary | beta |  |
| CASTGIAGPTDTQYF     | Han; 2013; dietary | beta |  |
| CATIGPAGDTQYF       | Han; 2013; dietary | beta |  |
| CATPSGNTIYF         | Han; 2013; dietary | beta |  |
| CATSDLGLGVNEQFF     | Han; 2013; dietary | beta |  |
| CATSRAQGQPQHF       | Han; 2013; dietary | beta |  |
| CATSRDHSSGASQGNIQYF | Han; 2013; dietary | beta |  |
| CATSRDNTGYTGELFF    | Han; 2013; dietary | beta |  |
| CATSRDQGSQTQYF      | Han; 2013; dietary | beta |  |
| CAWDSTGISYNEQFF     | Han; 2013; dietary | beta |  |
| CAWRATEGQETQYF      | Han; 2013; dietary | beta |  |
| CAWSDSGSSYEQYF      | Han; 2013; dietary | beta |  |
| CAWSVTGTRLYEYF      | Han; 2013; dietary | beta |  |
| CSALDSYSNQPQHF      | Han; 2013; dietary | beta |  |
| CSARAAIGTMNTEAFF    | Han; 2013; dietary | beta |  |
| CSARDADGYESEKLFF    | Han; 2013; dietary | beta |  |

|                    |                    |      |  |
|--------------------|--------------------|------|--|
| CSARDRQGYSNQPQHF   | Han; 2013; dietary | beta |  |
| CSARPPNGRYNEQFF    | Han; 2013; dietary | beta |  |
| CSARVKGLAGIRSYEQYF | Han; 2013; dietary | beta |  |
| CSDTVRRGPGGYTF     | Han; 2013; dietary | beta |  |
| CSVLGQGSPSYEQYF    | Han; 2013; dietary | beta |  |
| CSVVEGGEQYF        | Han; 2013; dietary | beta |  |
| CAWSGVSADTQYF      | Han; 2013; dietary | beta |  |
| CASSLGARTGELFF     | Han; 2013; dietary | beta |  |
| CASSPRSRDTQYF      | Han; 2013; dietary | beta |  |
| CASSVGGVQPQHF      | Han; 2013; dietary | beta |  |
| CSAREGDTQYF        | Han; 2013; dietary | beta |  |
| CASSSGELFF         | Han; 2013; dietary | beta |  |
| CASDRGETQYF        | Han; 2013; dietary | beta |  |
| CASGESNEQYF        | Han; 2013; dietary | beta |  |
| CASKPLQGYNEQFF     | Han; 2013; dietary | beta |  |
| CASNIRASNQPQHF     | Han; 2013; dietary | beta |  |
| CASNLAGGSNEQFF     | Han; 2013; dietary | beta |  |
| CASQRQSYEQYF       | Han; 2013; dietary | beta |  |
| CASRFGQGGNSNQPQHF  | Han; 2013; dietary | beta |  |
| CASRSRGTIYEQYF     | Han; 2013; dietary | beta |  |
| CASSDGLAYEQYF      | Han; 2013; dietary | beta |  |
| CASSDTGSINQPQHF    | Han; 2013; dietary | beta |  |
| CASSFASSSGNTIYF    | Han; 2013; dietary | beta |  |
| CASSFIVLSGSSYEQYF  | Han; 2013; dietary | beta |  |
| CASSFSGRTYEQYF     | Han; 2013; dietary | beta |  |
| CASSFSQVDEQFF      | Han; 2013; dietary | beta |  |
| CASSGQQGGSYGYTF    | Han; 2013; dietary | beta |  |
| CASSGSATGELFF      | Han; 2013; dietary | beta |  |
| CASSKLD SGYTF      | Han; 2013; dietary | beta |  |
| CASSLDDGYTF        | Han; 2013; dietary | beta |  |
| CASSLDRGDTQYF      | Han; 2013; dietary | beta |  |
| CASSLEQSAMNTEAFF   | Han; 2013; dietary | beta |  |
| CASSLGELFF         | Han; 2013; dietary | beta |  |
| CASSLGSGSYEQYF     | Han; 2013; dietary | beta |  |
| CASSLGNTTEAFF      | Han; 2013; dietary | beta |  |
| CASSLGQGAQTQYF     | Han; 2013; dietary | beta |  |
| CASSLGRVEAFF       | Han; 2013; dietary | beta |  |
| CASSLLGGVQETQYF    | Han; 2013; dietary | beta |  |
| CASSLRGTSSYNSPLHF  | Han; 2013; dietary | beta |  |
| CASSLSGGSWTEAFF    | Han; 2013; dietary | beta |  |
| CASSLSGWTEAFF      | Han; 2013; dietary | beta |  |

|                      |                    |      |  |
|----------------------|--------------------|------|--|
| CASSLSQGGHNEQFF      | Han; 2013; dietary | beta |  |
| CASSLTASNQPQHF       | Han; 2013; dietary | beta |  |
| CASSPAGYNEQFF        | Han; 2013; dietary | beta |  |
| CASSPGLVVDEQYF       | Han; 2013; dietary | beta |  |
| CASSPPGQGITDTQYF     | Han; 2013; dietary | beta |  |
| CASSPRNKRKADQPQHF    | Han; 2013; dietary | beta |  |
| CASSPRVDRGLHEQYF     | Han; 2013; dietary | beta |  |
| CASSPTSGRTTSYEQYF    | Han; 2013; dietary | beta |  |
| CASSPWDGSSYEQYF      | Han; 2013; dietary | beta |  |
| CASSQDGGDYGTYF       | Han; 2013; dietary | beta |  |
| CASSQDGGTYNEQFF      | Han; 2013; dietary | beta |  |
| CASSQGRGKVEQYF       | Han; 2013; dietary | beta |  |
| CASSQTGLTNYGYTF      | Han; 2013; dietary | beta |  |
| CASSRGVEQYF          | Han; 2013; dietary | beta |  |
| CASSRSGNTEAFF        | Han; 2013; dietary | beta |  |
| CASSSPLGGYGYTF       | Han; 2013; dietary | beta |  |
| CASSSPVRSGANVLTf     | Han; 2013; dietary | beta |  |
| CASSSTPGGLWYGYTF     | Han; 2013; dietary | beta |  |
| CASSWMTRIYNEQFF      | Han; 2013; dietary | beta |  |
| CASSYDSAYEQYF        | Han; 2013; dietary | beta |  |
| CASSYDVRSGNYEQYF     | Han; 2013; dietary | beta |  |
| CASSYSVAGAFF         | Han; 2013; dietary | beta |  |
| CASTAGFNQPQHF        | Han; 2013; dietary | beta |  |
| CASTFSYAGTDTQYF      | Han; 2013; dietary | beta |  |
| CATSTLQGGPRDEQFF     | Han; 2013; dietary | beta |  |
| CATSVTGSYGYTF        | Han; 2013; dietary | beta |  |
| CATTGSSYEQYF         | Han; 2013; dietary | beta |  |
| CAWNRGGSSPLHF        | Han; 2013; dietary | beta |  |
| CAWRRQGEEKLFF        | Han; 2013; dietary | beta |  |
| CAYSPGKNTEAFF        | Han; 2013; dietary | beta |  |
| CSAPGQRNTIYF         | Han; 2013; dietary | beta |  |
| CSARDPDSPPGGYTF      | Han; 2013; dietary | beta |  |
| CSVGGGEDYTF          | Han; 2013; dietary | beta |  |
| CASSQERGGKWAYEQYF    | Han; 2013; dietary | beta |  |
| CATSDLLTGNAFF        | Han; 2013; dietary | beta |  |
| CASSLNGGSYEQYF       | Han; 2013; dietary | beta |  |
| CASRPiPGQEKSSGANVLTf | Han; 2013; dietary | beta |  |
| CASSFFPRTGSNEQFF     | Han; 2013; dietary | beta |  |
| CASSQEGVGGNYGYTF     | Han; 2013; dietary | beta |  |
| CASSQEQGTNYGYTF      | Han; 2013; dietary | beta |  |
| CASSQLTLGPAKNIQYF    | Han; 2013; dietary | beta |  |

|                    |                    |      |  |
|--------------------|--------------------|------|--|
| CASSQQLNYSPLHF     | Han; 2013; dietary | beta |  |
| CASSVEGGGGPSTDQYF  | Han; 2013; dietary | beta |  |
| CASSVPKGGFNEQFF    | Han; 2013; dietary | beta |  |
| CASGSGVTEAFF       | Han; 2013; dietary | beta |  |
| CASRPGATNYGYTF     | Han; 2013; dietary | beta |  |
| CASSLDGGVNGYTF     | Han; 2013; dietary | beta |  |
| CASSLDGVQIYGYTF    | Han; 2013; dietary | beta |  |
| CASSLGNTTEAFF      | Han; 2013; dietary | beta |  |
| CASSLGQGVGTEAFF    | Han; 2013; dietary | beta |  |
| CASSLGYEQYF        | Han; 2013; dietary | beta |  |
| CASSLPVAGGQETQYF   | Han; 2013; dietary | beta |  |
| CASSLTGGSYGYTF     | Han; 2013; dietary | beta |  |
| CASSLVWNTDTQYF     | Han; 2013; dietary | beta |  |
| CASSPDGTGIEQFF     | Han; 2013; dietary | beta |  |
| CASSPGAFTNTEAFF    | Han; 2013; dietary | beta |  |
| CASSPWGSYEQYF      | Han; 2013; dietary | beta |  |
| CASSPYIGEVGNTEAFF  | Han; 2013; dietary | beta |  |
| CASSQEEADTQYF      | Han; 2013; dietary | beta |  |
| CASSQELGQSSYNPLHF  | Han; 2013; dietary | beta |  |
| CASSQERGTAIYGYTF   | Han; 2013; dietary | beta |  |
| CASSQERSADTQYF     | Han; 2013; dietary | beta |  |
| CASSQPQGWGNTEAFF   | Han; 2013; dietary | beta |  |
| CASSSYTGELFF       | Han; 2013; dietary | beta |  |
| CASSYIQGNQPQHF     | Han; 2013; dietary | beta |  |
| CASSYQGGGTDQYF     | Han; 2013; dietary | beta |  |
| CASTRGTGTPATNEKLFF | Han; 2013; dietary | beta |  |
| CSASLQENTTEAFF     | Han; 2013; dietary | beta |  |
| CSVQERDSANYGYTF    | Han; 2013; dietary | beta |  |
| CASRTGNQPQHF       | Han; 2013; dietary | beta |  |
| CASRGGNTEAFF       | Han; 2013; dietary | beta |  |
| CASSFRVGYNEQFF     | Han; 2013; dietary | beta |  |
| CASIAGNTEAFF       | Han; 2013; dietary | beta |  |
| CASSSSYEQYF        | Han; 2013; dietary | beta |  |
| CASSLGNRPEAFF      | Han; 2013; dietary | beta |  |
| CASSFGSDTQYF       | Han; 2013; dietary | beta |  |
| CAWRSGGASPLHF      | Han; 2013; dietary | beta |  |
| CASKAGEFEFF        | Han; 2013; dietary | beta |  |
| CASSLEYEQYF        | Han; 2013; dietary | beta |  |
| CASSRLGGRAGETQYF   | Han; 2013; dietary | beta |  |
| CATTGGLGTEAFF      | Han; 2013; dietary | beta |  |
| CAGARGNQPQHF       | Han; 2013; dietary | beta |  |



|                   |                    |      |  |
|-------------------|--------------------|------|--|
| CAGTSGNQPPHF      | Han; 2013; dietary | beta |  |
| CASEPLAGTNEQFF    | Han; 2013; dietary | beta |  |
| CASGQDWSSYNEQFF   | Han; 2013; dietary | beta |  |
| CASMTGNSNQPPHF    | Han; 2013; dietary | beta |  |
| CASRPANQETQYF     | Han; 2013; dietary | beta |  |
| CASRSMDTYEQYF     | Han; 2013; dietary | beta |  |
| CASRTGTFFNQPPHF   | Han; 2013; dietary | beta |  |
| CASSAPEGGGFTDTQYF | Han; 2013; dietary | beta |  |
| CASSATTGFSEKLFF   | Han; 2013; dietary | beta |  |
| CASSFGTAGTQYF     | Han; 2013; dietary | beta |  |
| CASSGGNQPPHF      | Han; 2013; dietary | beta |  |
| CASSGQATSYEQYF    | Han; 2013; dietary | beta |  |
| CASSHSRDRVGEKLFF  | Han; 2013; dietary | beta |  |
| CASSIAEGTIYNEQFF  | Han; 2013; dietary | beta |  |
| CASSIPGRRETQYF    | Han; 2013; dietary | beta |  |
| CASSISSDGYTF      | Han; 2013; dietary | beta |  |
| CASSLDEGYTGELFF   | Han; 2013; dietary | beta |  |
| CASSLDSSNQPPHF    | Han; 2013; dietary | beta |  |
| CASSLGAGANVLTF    | Han; 2013; dietary | beta |  |
| CASSLGGLAGEQYF    | Han; 2013; dietary | beta |  |
| CASSLGQLFF        | Han; 2013; dietary | beta |  |
| CASSLGLAGEQYF     | Han; 2013; dietary | beta |  |
| CASSLGSKSTQYF     | Han; 2013; dietary | beta |  |
| CASSLGSNEQFF      | Han; 2013; dietary | beta |  |
| CASSLGSRETQYF     | Han; 2013; dietary | beta |  |
| CASSLGTSEQYF      | Han; 2013; dietary | beta |  |
| CASSLGTTSNEQYF    | Han; 2013; dietary | beta |  |
| CASSLLNTEAFF      | Han; 2013; dietary | beta |  |
| CASSLSRDNYNEQFF   | Han; 2013; dietary | beta |  |
| CASSLVGVADTQYF    | Han; 2013; dietary | beta |  |
| CASSPEPTGSNEQFF   | Han; 2013; dietary | beta |  |
| CASSPGQGVTEAFF    | Han; 2013; dietary | beta |  |
| CASSPGTVYGYTF     | Han; 2013; dietary | beta |  |
| CASSPQGVGADYGYTF  | Han; 2013; dietary | beta |  |
| CASSPRAEDWTYYGYTF | Han; 2013; dietary | beta |  |
| CASSQDGISGSGEQYF  | Han; 2013; dietary | beta |  |
| CASSQGATSNQPPHF   | Han; 2013; dietary | beta |  |
| CASSRTSGGTGETQYF  | Han; 2013; dietary | beta |  |
| CASSSDSHYSNQPPHF  | Han; 2013; dietary | beta |  |
| CASSSLGGRAGETQYF  | Han; 2013; dietary | beta |  |
| CASSTERLGDGYTF    | Han; 2013; dietary | beta |  |

|                    |                    |      |  |
|--------------------|--------------------|------|--|
| CASSTGNQETQYF      | Han; 2013; dietary | beta |  |
| CASSTGNQPQHF       | Han; 2013; dietary | beta |  |
| CASSTRQGTTNTGELFF  | Han; 2013; dietary | beta |  |
| CASSTTGYGELFF      | Han; 2013; dietary | beta |  |
| CASSWGTDYEQYF      | Han; 2013; dietary | beta |  |
| CASSYGTLDPYGYTF    | Han; 2013; dietary | beta |  |
| CASSYSANNYGYTF     | Han; 2013; dietary | beta |  |
| CASSYTGLEQYF       | Han; 2013; dietary | beta |  |
| CASSYVGGAEAFF      | Han; 2013; dietary | beta |  |
| CASSYVREDYGYTF     | Han; 2013; dietary | beta |  |
| CASTGGYNSPLHF      | Han; 2013; dietary | beta |  |
| CASTLGGEQYF        | Han; 2013; dietary | beta |  |
| CASVQGNTEAFF       | Han; 2013; dietary | beta |  |
| CATSTYEGADQPQHF    | Han; 2013; dietary | beta |  |
| CAWSVGGIQPQHF      | Han; 2013; dietary | beta |  |
| CSAPGHLNYGYTF      | Han; 2013; dietary | beta |  |
| CSARDGGGDWEKLFF    | Han; 2013; dietary | beta |  |
| CSAREGQFSGNTIYF    | Han; 2013; dietary | beta |  |
| CASSYFGGPGNTIYF    | Han; 2013; dietary | beta |  |
| CASSQDRRSSYNSPLHF  | Han; 2013; dietary | beta |  |
| CASSQLDLQTFYEQYF   | Han; 2013; dietary | beta |  |
| CASSAVGGAYEQYF     | Han; 2013; dietary | beta |  |
| CSVTTGGQEAF        | Han; 2013; dietary | beta |  |
| CSVALGA VRSTDTQYF  | Han; 2013; dietary | beta |  |
| CSARDIVNANTGELFF   | Han; 2013; dietary | beta |  |
| CSAPIQAGTEAFF      | Han; 2013; dietary | beta |  |
| CATSRDRSWDSPLHF    | Han; 2013; dietary | beta |  |
| CASTNGGMNTEAFF     | Han; 2013; dietary | beta |  |
| CASSYSVGNTGELFF    | Han; 2013; dietary | beta |  |
| CASSVGVVYEQYF      | Han; 2013; dietary | beta |  |
| CASSSSTVSGNTIYF    | Han; 2013; dietary | beta |  |
| CASSQQAPTSSYNSPLHF | Han; 2013; dietary | beta |  |
| CASSQDLWSWESPLHF   | Han; 2013; dietary | beta |  |
| CASSPVLGAFFGYGYTF  | Han; 2013; dietary | beta |  |
| CASSPTWTGGNEQFF    | Han; 2013; dietary | beta |  |
| CASSPDRPPIYNEQFF   | Han; 2013; dietary | beta |  |
| CASSPAVAGGRDTQYF   | Han; 2013; dietary | beta |  |
| CASSNPGLQETQYF     | Han; 2013; dietary | beta |  |
| CASSNDRARAKNIQYF   | Han; 2013; dietary | beta |  |
| CASSLVQDVGDEAFF    | Han; 2013; dietary | beta |  |
| CASSLTSGPLYEQFF    | Han; 2013; dietary | beta |  |

|                              |                    |       |  |
|------------------------------|--------------------|-------|--|
| CASSLRGGGETQYF               | Han; 2013; dietary | beta  |  |
| CASSLNLGNTEAFF               | Han; 2013; dietary | beta  |  |
| CASSLGETQYF                  | Han; 2013; dietary | beta  |  |
| CASSLFMGWEQYF                | Han; 2013; dietary | beta  |  |
| CASSLEAGTLDYGYTF             | Han; 2013; dietary | beta  |  |
| CASSIGTGGPYEQYF              | Han; 2013; dietary | beta  |  |
| CASSHPSPHEKLFF               | Han; 2013; dietary | beta  |  |
| CASSFSGGAGEQFF               | Han; 2013; dietary | beta  |  |
| CASSES GTIGSQPHF             | Han; 2013; dietary | beta  |  |
| CASSELTRGTDQYF               | Han; 2013; dietary | beta  |  |
| CASSDGLAGFSTDTQYF            | Han; 2013; dietary | beta  |  |
| CASRLTDTQYF                  | Han; 2013; dietary | beta  |  |
| CASQQTGGFNEQYF               | Han; 2013; dietary | beta  |  |
| CASKTGVSYNEQFF               | Han; 2013; dietary | beta  |  |
| CASGGGMGGQPQHF               | Han; 2013; dietary | beta  |  |
| CAGTTGYEQYF                  | Han; 2013; dietary | beta  |  |
| CALGGLPTLGDTPTDKLIF          | Han; 2013; dietary | delta |  |
| CALCLLADWGYTDKLIF            | Han; 2013; dietary | delta |  |
| CALAPLPTLGDTGPDKLIF          | Han; 2013; dietary | delta |  |
| CALGDGGGFYTSRVLGGYAFVTTDKLIF | Han; 2013; dietary | delta |  |
| CALGELPYWALRGADKLIF          | Han; 2013; dietary | delta |  |
| CALGGYADKLIF                 | Han; 2013; dietary | delta |  |
| CASSPSYGGYAVDKLIF            | Han; 2013; dietary | delta |  |
| CACDTLLGDTLLTAQLFF           | Han; 2013; dietary | delta |  |
| CACDTLLGENKLIF               | Han; 2013; dietary | delta |  |
| CAFNRGLLYTDKLIF              | Han; 2013; dietary | delta |  |
| CALGAFLPRYWGPRTDKLIF         | Han; 2013; dietary | delta |  |
| CALGDPSLPLNWGIRGHGQLIF       | Han; 2013; dietary | delta |  |
| CALGEARPSYWGIRTTDKLIF        | Han; 2013; dietary | delta |  |
| CALGEFFPRYWGTYYTDKLIF        | Han; 2013; dietary | delta |  |
| CALGEKPPFLSKVLGDTHYTDKLIF    | Han; 2013; dietary | delta |  |
| CALGELIGWGPDKADKLIF          | Han; 2013; dietary | delta |  |
| CALGELQPRYWGRRFDKTKLFF       | Han; 2013; dietary | delta |  |
| CALGELRSLHLHWGIRTDKLIF       | Han; 2013; dietary | delta |  |
| CALGERFRGYWGIQYTDKLIF        | Han; 2013; dietary | delta |  |
| CALGERHPSYWGNGHGTDKLIF       | Han; 2013; dietary | delta |  |
| CALGFPPVLGDPYTDKLIF          | Han; 2013; dietary | delta |  |
| CALGGSGISYVGILGKLIF          | Han; 2013; dietary | delta |  |
| CALGGTSYVPWGIVRRDKLIF        | Han; 2013; dietary | delta |  |
| CALKGKGGNGVYWGSTRPLIF        | Han; 2013; dietary | delta |  |
| CALGNEAFRLVLGETDKLIF         | Han; 2013; dietary | delta |  |

|                              |                    |       |  |
|------------------------------|--------------------|-------|--|
| CALGPLSTPPYWGILGTDKLIF       | Han; 2013; dietary | delta |  |
| CALGPRFLRGVVGIRYTDKLIF       | Han; 2013; dietary | delta |  |
| CALGVLPTLGDDQPTDKLIF         | Han; 2013; dietary | delta |  |
| CALRGGRSPVLGDTLKRRTDKLIF     | Han; 2013; dietary | delta |  |
| CALGGLPTLGDTPTDKLIF          | Han; 2013; dietary | delta |  |
| CALGELRSLHLHWGIRTDKLIF       | Han; 2013; dietary | delta |  |
| CALGERSPSYWGPHTDKLIF         | Han; 2013; dietary | delta |  |
| CAASAGGPQTDKLIF              | Han; 2013; dietary | delta |  |
| CALGDDGGFYTSRVLGGYAFVTTDKLIF | Han; 2013; dietary | delta |  |
| CALGELVRSYFGIRGGKLIF         | Han; 2013; dietary | delta |  |
| CALGERLPNYWGTYTDKLIF         | Han; 2013; dietary | delta |  |
| CALGERRPSYWGIRRGPLIF         | Han; 2013; dietary | delta |  |
| CALGGSGISYVGILGKLIF          | Han; 2013; dietary | delta |  |
| CAASPLVGNTDKLIF              | Han; 2013; dietary | delta |  |
| CACDTVGIQSDKLIF              | Han; 2013; dietary | delta |  |
| CALCLADWGYTDKLIF             | Han; 2013; dietary | delta |  |
| CALGDPPSRGAPDKLIF            | Han; 2013; dietary | delta |  |
| CALGDPTGPYWGGYYLSYTDKLIF     | Han; 2013; dietary | delta |  |
| CALGECPSYWGRIPTDKLIF         | Han; 2013; dietary | delta |  |
| CALGECPTRHPTGGYIPYTDKLIF     | Han; 2013; dietary | delta |  |
| CALGEFFPRYWGTTYTDKLIF        | Han; 2013; dietary | delta |  |
| CALGELPYWALRGADKLIF          | Han; 2013; dietary | delta |  |
| CALGELQPRYWGRFRDCKTLFF       | Han; 2013; dietary | delta |  |
| CALGELRPSYVFGGYAYKLIF        | Han; 2013; dietary | delta |  |
| CALGELSPRYWGIGYTDKLIF        | Han; 2013; dietary | delta |  |
| CALGELSRPADWGILIYTDKLIF      | Han; 2013; dietary | delta |  |
| CALGEPTGAFLTGGFTDKLIF        | Han; 2013; dietary | delta |  |
| CALGEQNPRYWGASYTDKLIF        | Han; 2013; dietary | delta |  |
| CALGERLPSYWGISYTDKLIF        | Han; 2013; dietary | delta |  |
| CALGESYVSYWGGYLYTDKLIF       | Han; 2013; dietary | delta |  |
| CALGEYLPRYWGIHGTDKLIF        | Han; 2013; dietary | delta |  |
| CALGFPPVLGDPYTDKLIF          | Han; 2013; dietary | delta |  |
| CALGELPLLGDTLRSYTDKLIF       | Han; 2013; dietary | delta |  |
| CALGVPLLQVKLGDTKGLLGDTDKLIF  | Han; 2013; dietary | delta |  |
| CALGNIWGVTDKLIF              | Han; 2013; dietary | delta |  |
| CALGELVRLYWGGRRMDKLIF        | Han; 2013; dietary | delta |  |
| CALGEGAGILTGDKLIF            | Han; 2013; dietary | delta |  |
| CAFLRIRPDKLIF                | Han; 2013; dietary | delta |  |
| CALVSNPPPRYPGVRDTPDKLIF      | Han; 2013; dietary | delta |  |
| CALVADYWIGTDKLIF             | Han; 2013; dietary | delta |  |
| CALGPRFLRRGIRADKLIF          | Han; 2013; dietary | delta |  |

|                           |                    |       |  |
|---------------------------|--------------------|-------|--|
| CALGPRAHQRTGDRVTAQLFF     | Han; 2013; dietary | delta |  |
| CALGNPKGTSYGLRGIPPYTDKLIF | Han; 2013; dietary | delta |  |
| CALGKGGSYVVHFYWGIESTDKLIF | Han; 2013; dietary | delta |  |
| CALGISLLRLGDMISDKLIF      | Han; 2013; dietary | delta |  |
| CALGEPPFLRRYRYTDKLIF      | Han; 2013; dietary | delta |  |
| CALGELPTWTYWGIDKLIF       | Han; 2013; dietary | delta |  |
| CALGELIRGYWGIRYTDKLIF     | Han; 2013; dietary | delta |  |
| CALGDPPPHRSLLYRYKLIF      | Han; 2013; dietary | delta |  |
| CALGALPTLGDRGVDKLIF       | Han; 2013; dietary | delta |  |
| CALDTPKHSSGGYFKRTDKLIF    | Han; 2013; dietary | delta |  |
| CASHFLRAGYAKLIF           | Han; 2013; dietary | delta |  |
| CASCPGVGDNDKLIF           | Han; 2013; dietary | delta |  |
| CAQTTYWGMGGQYTDKLIF       | Han; 2013; dietary | delta |  |
| CAPFSWPKLIF               | Han; 2013; dietary | delta |  |
| CALVSGGFPSYADKLIF         | Han; 2013; dietary | delta |  |
| CALRWGIRGADKLIF           | Han; 2013; dietary | delta |  |
| CALRVFTYWGDTDKLIF         | Han; 2013; dietary | delta |  |
| CALGVRIFPPSLLGDTGYGGVLIF  | Han; 2013; dietary | delta |  |
| CALGSLINWGIIVTDKLIF       | Han; 2013; dietary | delta |  |
| CALGSGAYPYRTGGRELIF       | Han; 2013; dietary | delta |  |
| CALGPPFLIGSWDTRQMFF       | Han; 2013; dietary | delta |  |
| CALGPGAFLRSWGQKLIF        | Han; 2013; dietary | delta |  |
| CALGNSYWGIPYTDKLIF        | Han; 2013; dietary | delta |  |
| CALGNHWADKLIF             | Han; 2013; dietary | delta |  |
| CALGLPIGLGDSYLYKLIF       | Han; 2013; dietary | delta |  |
| CALGKRPYPLYWGIRGYTDKLIF   | Han; 2013; dietary | delta |  |
| CALGFYWGEYTDKLIF          | Han; 2013; dietary | delta |  |
| CALGEYSRLTGVYTDKLIF       | Han; 2013; dietary | delta |  |
| CALGEWFPGYFLTFRNTDKLIF    | Han; 2013; dietary | delta |  |
| CALGESVRWVFGEYTDKLIF      | Han; 2013; dietary | delta |  |
| CALGERYPKYWGAPGTDKLIF     | Han; 2013; dietary | delta |  |
| CALGERSYVPYWGTRGTDKLIF    | Han; 2013; dietary | delta |  |
| CALGERPRPRYWGNALTAQLFF    | Han; 2013; dietary | delta |  |
| CALGERGPRYWGIAITDKLIF     | Han; 2013; dietary | delta |  |
| CALGERFPWPHTDKLIF         | Han; 2013; dietary | delta |  |
| CALGEPDSAYWGIRGNTDKLIF    | Han; 2013; dietary | delta |  |
| CALGEPRAVLGDTLGDKLIF      | Han; 2013; dietary | delta |  |
| CALGEPLPSYWGPRGSDKLIF     | Han; 2013; dietary | delta |  |
| CALGEPDSTFVRGGYAGNTDKLIF  | Han; 2013; dietary | delta |  |
| CALGEPDLPTTWYTDKLIF       | Han; 2013; dietary | delta |  |
| CALGEPALQLGVNKLIF         | Han; 2013; dietary | delta |  |

|                                |                    |       |  |
|--------------------------------|--------------------|-------|--|
| CALGENPPPYLGGYPYTDKLIF         | Han; 2013; dietary | delta |  |
| CALGENFPSSWGIHRYTDKLIF         | Han; 2013; dietary | delta |  |
| CALGELVYPGGYYGRETAQLFF         | Han; 2013; dietary | delta |  |
| CALGELVFLLRAGLIF               | Han; 2013; dietary | delta |  |
| CALGELSDLQCVLGDRPTRPLIF        | Han; 2013; dietary | delta |  |
| CALGELRRIYWGIRIDKLIF           | Han; 2013; dietary | delta |  |
| CALGELLPRYWIGGGTDKLIF          | Han; 2013; dietary | delta |  |
| CALGELLASETYTGGSVVLYRARKTDKLIF | Han; 2013; dietary | delta |  |
| CALGEKGNMPLGDIIDKLIF           | Han; 2013; dietary | delta |  |
| CALGEHEVHPGGYWYTDKLIF          | Han; 2013; dietary | delta |  |
| CALGEGTGDFGRWGILVYTDKLIF       | Han; 2013; dietary | delta |  |
| CALGEGPFLRTGGLYTDKLIF          | Han; 2013; dietary | delta |  |
| CALGEGPAPIWGIRRRSYTDKLIF       | Han; 2013; dietary | delta |  |
| CALGEFYWGILSDKLIF              | Han; 2013; dietary | delta |  |
| CALGEEIPTGGYPDKLIF             | Han; 2013; dietary | delta |  |
| CALGEDPSFLRLGIRYTDKLIF         | Han; 2013; dietary | delta |  |
| CALGDWRSSYFNWGISSPDKLIF        | Han; 2013; dietary | delta |  |
| CALGDPSEEHTGGYNTDKLIF          | Han; 2013; dietary | delta |  |
| CALGDLLGLPRGPTDKLIF            | Han; 2013; dietary | delta |  |
| CALGDFPTWGGVPDKLIF             | Han; 2013; dietary | delta |  |
| CALGASLGDNSPDKLIF              | Han; 2013; dietary | delta |  |
| CALGALGSLPTHWGIRATDKLIF        | Han; 2013; dietary | delta |  |
| CALGALGLRGLGVYRKLIF            | Han; 2013; dietary | delta |  |
| CALEAPYTDKLIF                  | Han; 2013; dietary | delta |  |
| CALAQPSSNLIHWGILDKLIF          | Han; 2013; dietary | delta |  |
| CAITGSKGTDKLIF                 | Han; 2013; dietary | delta |  |
| CAFRHGPNYPLIYWGISKLIF          | Han; 2013; dietary | delta |  |
| CAFRGLWGYTDKLIF                | Han; 2013; dietary | delta |  |
| CAFLALPMYTDKLIF                | Han; 2013; dietary | delta |  |
| CACVKAFLKRGDTPYTDKLIF          | Han; 2013; dietary | delta |  |
| CACTFLGLGGSNTDKLIF             | Han; 2013; dietary | delta |  |
| CACETWGIKGTDKLIF               | Han; 2013; dietary | delta |  |
| CACERGGYAFTDKLIF               | Han; 2013; dietary | delta |  |
| CACDTVYGGYWATDKLIF             | Han; 2013; dietary | delta |  |
| CACDSRTSTWGIRMADKLIF           | Han; 2013; dietary | delta |  |
| CALGELPPPGGYFDKLIF             | Han; 2013; dietary | delta |  |
| CAFKGLLGGSVGLIF                | Han; 2013; dietary | delta |  |
| CALGDSSLGGWGILSSTDKLIF         | Han; 2013; dietary | delta |  |
| CALGVLHWGNSLTAQLFF             | Han; 2013; dietary | delta |  |
| CALPFSYWGIRLVGTDKLIF           | Han; 2013; dietary | delta |  |
| CASTGAVGKSPKLIF                | Han; 2013; dietary | delta |  |

|                            |                    |       |  |
|----------------------------|--------------------|-------|--|
| CAASAGLPGGGLGYTDKLIF       | Han; 2013; dietary | delta |  |
| CAASALRGSFDKLIF            | Han; 2013; dietary | delta |  |
| CACDHDYGTGGVRKLIF          | Han; 2013; dietary | delta |  |
| CACRLPTRWGIGYTDKLIF        | Han; 2013; dietary | delta |  |
| CACRPSYGGIVKLIF            | Han; 2013; dietary | delta |  |
| CAFILTIYGPGGITDKLIF        | Han; 2013; dietary | delta |  |
| CAFPTGGLLGDTDKLIF          | Han; 2013; dietary | delta |  |
| CAFVGGPYTDKLIF             | Han; 2013; dietary | delta |  |
| CALADLRPGGYSAQLFF          | Han; 2013; dietary | delta |  |
| CALEVVHHPIRYTDKLIF         | Han; 2013; dietary | delta |  |
| CALGAHLRNYWGPLYTDKLIF      | Han; 2013; dietary | delta |  |
| CALGAYPPGGTGRYTDKLIF       | Han; 2013; dietary | delta |  |
| CALGDFLPSYWGIRGTDKLIF      | Han; 2013; dietary | delta |  |
| CALGDPPFQNYQGPYTDKLIF      | Han; 2013; dietary | delta |  |
| CALGEAFLSYWGTNHDKLIF       | Han; 2013; dietary | delta |  |
| CALGEGGGVLRNPYTDKLIF       | Han; 2013; dietary | delta |  |
| CALGEHGAFLPYWGIRRGKLIF     | Han; 2013; dietary | delta |  |
| CALGEIYRGYWGIRAGDKLIF      | Han; 2013; dietary | delta |  |
| CALGELHWGTRYTDKLIF         | Han; 2013; dietary | delta |  |
| CALGELLRTGGLAQLFF          | Han; 2013; dietary | delta |  |
| CALGELMLGRWGEYTDKLIF       | Han; 2013; dietary | delta |  |
| CALGELNLPQYWGPLVGTDKLIF    | Han; 2013; dietary | delta |  |
| CALGELPPWGIPYTDKLIF        | Han; 2013; dietary | delta |  |
| CALGELRLRWMGDTLFLQLTDKLIF  | Han; 2013; dietary | delta |  |
| CALGELRRGIRGQRIGTDKLIF     | Han; 2013; dietary | delta |  |
| CALGELSRPSYYYDPSYTDKLIF    | Han; 2013; dietary | delta |  |
| CALGELSSPHTGGYYTDKLIF      | Han; 2013; dietary | delta |  |
| CALGELSYRGGWGIRADKLIF      | Han; 2013; dietary | delta |  |
| CALGENKFVFGGLIVLTAQLFF     | Han; 2013; dietary | delta |  |
| CALGEPIGPPLLGVYTDKLIF      | Han; 2013; dietary | delta |  |
| CALGEPQTFLPRYWGGTYTDKLIF   | Han; 2013; dietary | delta |  |
| CALGEPSTGGSDKLIF           | Han; 2013; dietary | delta |  |
| CALGEQWILRGDTDKLIF         | Han; 2013; dietary | delta |  |
| CALGERLRGYALKTDKLIF        | Han; 2013; dietary | delta |  |
| CALGERLSPYYTDKLIF          | Han; 2013; dietary | delta |  |
| CALGERPSYGWGFGWTDKLIF      | Han; 2013; dietary | delta |  |
| CALGETTLSYWGIRYTDKLIF      | Han; 2013; dietary | delta |  |
| CALGGGLPTSGGYRSYTDKLIF     | Han; 2013; dietary | delta |  |
| CALGHRAPSRAQPYWGILAYTDKLIF | Han; 2013; dietary | delta |  |
| CALGKPAKSYWGMRYTDKLIF      | Han; 2013; dietary | delta |  |
| CALGPLPGGYSSWDTRQMFF       | Han; 2013; dietary | delta |  |

|                        |                             |       |  |
|------------------------|-----------------------------|-------|--|
| CALGQRIPSYWGIAGSTDKLIF | Han; 2013; dietary          | delta |  |
| CALGVISPSYWGPQYTDKLIF  | Han; 2013; dietary          | delta |  |
| CALGVSSSAGDLLTDKLIF    | Han; 2013; dietary          | delta |  |
| CALKPGGYSLTDKLIF       | Han; 2013; dietary          | delta |  |
| CALMAGPYTDKLIF         | Han; 2013; dietary          | delta |  |
| CASVCYGNHISRLDKLIF     | Han; 2013; dietary          | delta |  |
| LVGGSGGYNKLI           | Christophersen; 2022; Pheno | alpha |  |
| AVEGGSNYKLT            | Christophersen; 2022; Pheno | alpha |  |
| ASSIRATDTQY            | Christophersen; 2022; Pheno | beta  |  |
| ASSIRSTDTQY            | Christophersen; 2022; Pheno | beta  |  |
| SASRTSGRAGDEQF         | Christophersen; 2022; Pheno | beta  |  |
| ALSDQGSSASKII          | Christophersen; 2022; Pheno | alpha |  |
| ALSDPTGTASKLT          | Christophersen; 2022; Pheno | alpha |  |
| VVSGGYYGGSQGNLI        | Christophersen; 2022; Pheno | alpha |  |
| VVNPGGGNKLT            | Christophersen; 2022; Pheno | alpha |  |
| AVPNAGGTSYGKLT         | Christophersen; 2022; Pheno | alpha |  |
| AVEREGAQKLIV           | Christophersen; 2022; Pheno | alpha |  |
| AVGQGAQKLIV            | Christophersen; 2022; Pheno | alpha |  |
| AYRSEQGAQKLIV          | Christophersen; 2022; Pheno | alpha |  |
| ASSQQDTEAF             | Christophersen; 2022; Pheno | beta  |  |
| ASSLTVTDTQY            | Christophersen; 2022; Pheno | beta  |  |
| SASDSLNTAF             | Christophersen; 2022; Pheno | beta  |  |
| SASRQVADTQY            | Christophersen; 2022; Pheno | beta  |  |

**Supplementary Table S2:** All published gluten specific TCR sequences.
